# Supplementary material
Source: MDPI journal article supplement (https://www.mdpi.com/2071-1050/11/7/1880)
Supplement: s1 [file s1]

## Sheet: Sheet 1
	IN	PCa1	PCa2	PCa3	PCa4	PCa5	PMa1	PMa2	PMa3	PMa4	PMa5	PGa1	PGa2	PGa3	PCb1	PCb2	PCb3	PCb4	PCb5	PMb1	PMb2	PMb3	PMb4	PMb5	PGb1	PGb2	PGb3
Nitrosomonas	9.0981e-06	0	1.40053e-05	0	0.00064288	1.06757e-05	6.79359e-06	0	0.000166562	0	0	0	0	0	0	0	0	0	0	0	0	0	0	0	0	0	0
Nitrospira	4.6344e-06	0	9.10345e-05	0	1.8081e-05	1.06757e-05	8.49199e-06	3.73133e-06	0.00013325	0	7.19761e-06	0	1.47886e-05	0	0	0	0	0	0	5.29801e-06	3.15596e-06	0	0	2.26325e-06	0	0	0
Nitrosococcus	0	0	7.00265e-06	0	0	0	0	0	0	0	0	0	0	0	0	0	0	0	0	0	0	0	0	0	0	0	0
Methylomicrobium	0	0	0	0	0	5.33783e-06	0	0	0	0	0	0	0	0	0	0	0	0	0	0	0	0	0	0	0	0	0

## Sheet: Sheet 2
	IN	PCa1	PCa2	PCa3	PCa4	PCa5	PMa1	PMa2	PMa3	PMa4	PMa5	PGa1	PGa2	PGa3	PCb1	PCb2	PCb3	PCb4	PCb5	PMb1	PMb2	PMb3	PMb4	PMb5	PGb1	PGb2	PGb3
Nitrospira	4.8222e-06	0.000118939	0.000150235	4.10764e-05	0.000113707	0.000199968	9.61297e-05	0.000702788	0.000269469	3.1758e-05	5.24654e-05	4.22054e-05	0.000225014	4.02516e-05	7.02617e-05	6.12536e-05	0.000129065	3.07653e-05	8.74369e-05	2.68694e-05	0.000243021	0.000174959	0	3.04602e-05	4.75658e-05	8.29818e-05	0.000120086
Nitrosomonas	5.80104e-06	0.000383248	6.48071e-05	1.02691e-05	2.27413e-05	2.70226e-05	0.000112151	0.000322111	0.000287139	2.1172e-05	0	4.92396e-05	4.8916e-06	5.03145e-06	4.01496e-05	0.000100631	0	1.84592e-05	4.37185e-05	5.37389e-05	0.000574413	0.000133792	0	2.74142e-05	8.32402e-05	9.60841e-05	0.000209563
Nitrosococcus	0	0	1.47289e-05	0	2.72896e-05	1.62136e-05	5.34054e-06	0	0	0	0	0	0	5.03145e-06	0	2.84392e-05	0	0	5.46481e-06	0	9.46835e-06	5.14586e-06	0	0	1.18915e-05	0	7.06391e-06
Methylomicrobium	2.79773e-06	0	0	0	0	0	0	0	0	0	0	0	0	0	0	0	0	0	5.46481e-06	0	0	0	0	0	0	0	0
Nitrosospira	0	0	0	0	0	0	0	4.18326e-06	0	0	0	0	0	0	0	0	0	0	0	0	0	0	0	0	0	0	0

## Sheet: Sheet 3
	IN	PCa1	PCa2	PCa3	PCa4	PCa5	PMa1	PMa2	PMa3	PMa4	PMa5	PGa1	PGa2	PGa3	PCb1	PCb2	PCb3	PCb4	PCb5	PMb1	PMb2	PMb3	PMb4	PMb5	PGb1	PGb2	PGb3
Sulfurovum	0.000157561	8.23371e-05	0.0120796	7.19904e-05	1.6072e-05	3.2027e-05	0.00209413	0.00125	0.00536936	7.09971e-05	3.23892e-05	0.00282487	0.000133098	0.000208107	0.000204116	3.55739e-05	3.11923e-05	6.69728e-05	1.03994e-05	0.000164238	4.10275e-05	6.12203e-05	0.000289354	1.8106e-05	0.00258831	0.000280116	3.90166e-05
Halomonas	0.000263467	0.000159185	0.000322122	1.79976e-05	0.00135407	0.000998174	0.000176633	0.000164178	0.000236215	1.29086e-05	0.00066218	0.000200044	7.39432e-05	0.000475673	8.47275e-05	5.92898e-05	3.11923e-05	0.000191351	0.000465374	0.00100132	8.83668e-05	6.12203e-05	3.14515e-05	0.00036891	0.000189179	2.87299e-05	0.00044479
Marinobacter	7.67599e-05	9.69748e-05	0.000161061	0	9.0405e-05	8.00675e-05	4.75552e-05	0.000776117	8.78237e-05	7.09971e-05	5.03833e-05	6.36504e-05	4.43659e-05	2.12354e-05	0.000127091	0	4.45605e-06	3.5081e-05	0	0.000196026	3.78715e-05	1.05552e-05	3.14515e-05	2.03693e-05	5.15943e-05	7.18246e-06	1.1705e-05
Lutibacter	9.43949e-06	1.46377e-05	7.00265e-05	0	0	0	0.000650487	0.000305969	6.05681e-06	0	0	3.63717e-05	2.95773e-05	0	0	0	0	0	0	0.000116556	9.46787e-06	1.26663e-05	1.25806e-05	4.5265e-06	8.59904e-06	4.30948e-05	0
Pseudomonas	3.55923e-05	1.46377e-05	0	0	0.000245098	2.13513e-05	0	2.2388e-05	2.42272e-05	1.29086e-05	0.00039227	0	7.39432e-06	8.06945e-05	1.15537e-05	0	8.9121e-06	0.000102054	1.29993e-05	5.29801e-06	5.99632e-05	0	1.25806e-05	5.88446e-05	0	0	3.90166e-05
Shewanella	1.35618e-05	1.82971e-06	0	0	8.036e-06	5.33783e-06	0.000186824	9.32832e-05	6.35965e-05	0	1.07964e-05	2.12168e-05	0	0	0	0	8.9121e-06	6.37836e-06	0	3.70861e-05	3.15596e-06	2.11105e-06	1.25806e-05	2.26325e-06	8.59904e-06	1.43649e-05	7.80332e-06
Oleispira	6.21974e-06	7.50182e-05	0	0	0	0	5.0952e-05	1.49253e-05	0	0	0	2.42478e-05	0	0	0.000134794	0	0	0	0	9.00662e-05	3.15596e-06	0	0	0	8.59904e-05	0	0
Labrenzia	7.68345e-06	3.65942e-06	1.40053e-05	0	0.000142639	4.80405e-05	8.49199e-06	1.49253e-05	1.21136e-05	0	9.71677e-05	6.06195e-06	7.39432e-06	0	0	0	0	1.59459e-05	2.59985e-06	1.0596e-05	0	6.33314e-06	0	0	0	7.18246e-06	0
Thiobacillus	0	0	3.50133e-05	0	0	0	0	0	3.0284e-06	6.45428e-06	0	0	6.65489e-05	4.24708e-06	3.85125e-06	0	0	3.18918e-06	2.59985e-06	6.88742e-05	3.15596e-05	0	0	2.26325e-06	0	0	0
Massilia	2.30504e-05	9.14856e-06	0	0	2.009e-06	0	0	5.22386e-05	0	3.87257e-05	7.19761e-06	0	2.2183e-05	4.24708e-06	1.15537e-05	0	0	0	0	1.0596e-05	1.26238e-05	0	0	0	8.59904e-06	0	7.80332e-06
Colwellia	2.4879e-06	1.82971e-06	2.80106e-05	0	0	0	3.22696e-05	2.98506e-05	0	0	0	3.03097e-05	0	0	3.85125e-06	0	0	0	0	2.64901e-05	0	2.11105e-06	0	0	3.43962e-05	0	0
Thalassospira	6.04904e-06	1.82971e-06	0	0	1.8081e-05	2.66892e-05	0	1.49253e-05	3.0284e-06	0	1.07964e-05	9.09292e-06	1.47886e-05	0	0	5.92898e-06	1.33681e-05	0	2.59985e-06	2.11921e-05	2.84036e-05	4.22209e-06	0	0	0	0	0
Maribacter	0	0	7.00265e-06	0	6.027e-06	5.33783e-06	0	0	3.0284e-06	0	3.59881e-06	0	7.39432e-06	0	3.85125e-06	0	0	0	0	0	0	0	0	4.5265e-06	3.43962e-05	0	0
Hahella	1.8879e-05	0	7.00265e-06	0	6.027e-06	5.33783e-06	0	0	3.0284e-06	0	0	0	0	0	0	5.92898e-06	0	0	0	5.29801e-06	3.15596e-06	2.11105e-06	0	0	0	0	0
Sedimenticola	1.24395e-06	1.82971e-06	2.1008e-05	0	0	0	1.6984e-06	0	6.05681e-06	0	0	0	1.47886e-05	0	0	0	0	0	0	5.29801e-06	0	0	0	0	0	0	0
Aquabacterium	2.3172e-06	0	0	0	0	0	0	0	1.21136e-05	0	0	0	0	0	0	5.92898e-06	0	0	0	0	0	8.44418e-06	0	0	0	0	0
Paracoccus	0	0	0	0	2.009e-06	0	0	7.46266e-06	0	0	0	0	0	8.49416e-06	0	0	0	0	0	5.29801e-06	0	2.11105e-06	0	0	0	0	0
Dechloromonas	1.24395e-06	0	0	0	0	0	0	0	0	0	0	0	1.47886e-05	0	0	0	0	0	0	5.29801e-06	0	2.11105e-06	0	0	0	0	0
Bradyrhizobium	0	0	0	0	0	5.33783e-06	0	0	0	0	0	0	7.39432e-06	4.24708e-06	0	0	4.45605e-06	0	0	0	0	0	0	0	0	0	0
Acidovorax	0	0	0	0	0	0	0	0	0	0	0	0	0	0	0	0	4.45605e-06	0	0	0	0	0	0	0	0	0	1.56066e-05
Dinoroseobacter	0	0	1.40053e-05	0	2.009e-06	0	0	0	0	0	0	3.03097e-06	0	0	0	0	0	0	0	0	0	0	0	0	0	0	0
Rhizobium	3.73184e-06	0	0	0	0	0	0	0	0	0	0	0	0	0	0	0	0	0	0	0	6.31192e-06	0	0	2.26325e-06	0	0	0
Roseobacter	0	0	7.00265e-06	0	0	0	0	0	0	0	0	0	0	0	0	0	0	0	0	5.29801e-06	0	0	0	0	0	0	0
Azospirillum	0	1.82971e-06	0	0	0	0	0	0	6.05681e-06	0	3.59881e-06	0	0	0	0	0	0	0	0	0	0	0	0	0	0	0	0
Ensifer	0	0	7.00265e-06	0	0	0	0	0	3.0284e-06	0	0	0	0	0	0	0	0	0	0	0	0	0	0	0	0	0	0
Hyphomicrobium	3.73184e-06	0	0	0	0	0	0	0	0	0	0	0	0	0	0	0	0	0	0	0	0	0	0	2.26325e-06	0	0	0
Azospira	0	0	0	0	0	0	0	0	0	0	0	0	0	0	0	0	0	0	0	5.29801e-06	0	0	0	0	0	0	0
Thauera	1.24395e-06	0	0	0	0	0	0	3.73133e-06	0	0	0	0	0	0	0	0	0	0	0	0	0	0	0	0	0	0	0
Azoarcus	1.07325e-06	0	0	0	0	0	0	0	0	0	0	0	0	0	0	0	0	0	0	0	0	0	0	0	0	0	0
Rhodobacter	1.07325e-06	0	0	0	0	0	0	0	0	0	0	0	0	0	0	0	0	0	0	0	0	0	0	0	0	0	0

## Sheet: Sheet 4
	IN	PCa1	PCa2	PCa3	PCa4	PCa5	PMa1	PMa2	PMa3	PMa4	PMa5	PGa1	PGa2	PGa3	PCb1	PCb2	PCb3	PCb4	PCb5	PMb1	PMb2	PMb3	PMb4	PMb5	PGb1	PGb2	PGb3
Sulfurovum	0.00684872	0.00411	0.00600349	0.00580204	0.00208311	0.00206994	0.00998147	0.0127799	0.0112161	0.0079395	0.00203741	0.00203993	0.00326759	0.00072956	0.0190158	0.023948	0.00283943	0.0031319	0.00240452	0.0010076	0.00125614	0.00725566	0.00113017	0.00229365	0.00137941	0.00660797	0.00278789
Halomonas	0.00244439	0.000819358	0.00202669	0.000729106	0.00386603	0.00234557	0.00176505	0.00260199	0.000353402	0.000772778	0.00121545	0.00554297	0.000728849	0.0034566	0.000371383	0.00350677	0.00052836	0.00295346	0.00181978	0.00106134	0.000681721	0.000962276	0.000335998	0.00270182	0.00197398	0.0010875	0.00433959
Marinobacter	8.1605e-05	0.000277524	0.00295461	0.000189978	0.000718626	0.000178349	0.000435254	0.000811552	0.000344567	0.00042344	1.74885e-05	0.00571883	3.91328e-05	0.000221384	2.00748e-05	0.00921648	0.000177464	4.30714e-05	0.000404396	0.00025526	0.000261958	0.000766733	6.61813e-05	2.13222e-05	0.00229505	0.000441114	0.00113023
Lutibacter	6.57828e-05	0.00218055	0	0	0	2.16181e-05	0.00102805	1.6733e-05	4.41753e-06	3.52867e-06	3.4977e-05	0.000126616	0	5.03145e-06	0.000376402	0	4.03328e-06	0	2.18592e-05	0.000268694	0.000694346	0.000138938	5.09087e-06	7.00585e-05	0	4.80421e-05	4.47381e-05
Thiobacillus	0	0	0.000108994	2.56728e-05	4.54827e-06	0.000172945	7.20973e-05	4.18326e-05	2.65052e-05	3.52867e-06	0.000131164	4.92396e-05	4.8916e-06	2.01258e-05	0	0.000455027	0	9.22958e-05	8.74369e-05	8.06083e-05	3.15612e-05	6.68962e-05	0	6.09204e-06	1.18915e-05	4.36746e-06	0.00179659
Sedimenticola	2.79773e-06	2.64309e-05	5.3024e-05	1.02691e-05	0.000154641	0.000102686	1.33513e-05	0.000255179	6.62629e-05	9.17454e-05	0	7.03423e-06	5.38076e-05	2.51572e-05	5.01869e-06	4.37526e-05	8.06657e-06	6.15305e-06	7.65073e-05	0	0.000205148	0.000113209	3.05452e-05	0	3.56744e-05	2.18373e-05	1.88371e-05
Shewanella	9.97208e-05	2.64309e-05	0	2.56728e-05	0	2.70226e-05	2.67027e-05	0	3.97577e-05	7.05734e-06	8.74424e-06	0.000218061	1.95664e-05	2.51572e-05	2.00748e-05	0	0	0	5.46481e-06	5.37389e-05	9.46835e-06	0	2.03635e-05	0.000234544	0	1.31024e-05	7.06391e-06
Pseudomonas	1.63575e-05	0	0.000114885	5.13455e-06	9.09653e-06	9.1877e-05	1.06811e-05	0	0	7.05734e-06	0	7.03423e-06	6.84824e-05	7.04403e-05	1.50561e-05	3.93773e-05	0	6.15305e-06	3.27889e-05	0	9.46835e-06	1.02917e-05	0	2.43682e-05	2.37829e-05	3.05722e-05	3.53195e-05
Labrenzia	8.532e-06	2.64309e-05	1.17831e-05	1.02691e-05	9.09653e-06	1.08091e-05	1.60216e-05	1.25498e-05	0	3.52867e-06	3.4977e-05	2.11027e-05	1.95664e-05	6.03774e-05	0	4.37526e-06	1.20998e-05	1.84592e-05	2.18592e-05	4.03042e-05	1.26245e-05	1.02917e-05	0	5.17824e-05	2.37829e-05	8.73492e-06	7.06391e-06
Thalassospira	3.29311e-05	1.32155e-05	8.83733e-06	2.56728e-05	0	1.08091e-05	0	4.18326e-06	0	1.76433e-05	3.4977e-05	7.03423e-06	2.93496e-05	7.04403e-05	0	8.31299e-05	0	1.23061e-05	0	4.03042e-05	0	2.57293e-05	0	1.21841e-05	0	4.36746e-06	0
Colwellia	3.7196e-05	5.28618e-05	0	0	0	0	2.40324e-05	0	0	0	0	0.000105513	0	0	8.53178e-05	0	0	0	0	0.000120912	0	0	0	0	0	0	0
Hahella	9.71117e-06	0	1.47289e-05	5.13455e-06	0	1.08091e-05	0	8.36652e-06	0	0	0	0	4.8916e-06	6.03774e-05	0	8.75051e-06	1.20998e-05	0	0	0	0	5.14586e-06	1.01817e-05	0.000164485	0	0	0
Massilia	4.89422e-06	3.96464e-05	2.94578e-06	5.13455e-06	2.27413e-05	3.24272e-05	0	4.18326e-06	4.41753e-06	0	8.74424e-06	1.40685e-05	4.8916e-05	5.03145e-06	0	4.37526e-06	0	6.15305e-06	0	4.03042e-05	1.26245e-05	5.14586e-06	0	0	0	8.73492e-06	0
Paracoccus	9.78843e-07	0	9.72106e-05	0	0	1.62136e-05	2.67027e-06	0	0	0	0	1.40685e-05	0	1.50943e-05	0	2.84392e-05	0	0	0	0	0	1.02917e-05	0	3.04602e-06	0	4.36746e-06	2.82556e-05
Roseobacter	3.91537e-06	5.28618e-05	0	0	0	0	8.01081e-06	0	0	0	0	7.03423e-06	0	0	2.00748e-05	2.18763e-06	0	0	0	6.71736e-05	9.46835e-06	0	0	0	2.37829e-05	0	0
Dinoroseobacter	0	1.32155e-05	0	0	0	0	2.13622e-05	0	0	0	0	0	0	0	0	0	0	0	0	8.06083e-05	0	0	0	0	4.75658e-05	0	0
Azoarcus	0	0	5.89155e-06	5.13455e-06	0	4.32362e-05	0	0	0	0	0	0	0	5.03145e-06	0	1.09381e-05	0	6.15305e-06	1.09296e-05	0	0	0	5.09087e-06	3.04602e-06	0	4.36746e-06	2.5901e-05
Maribacter	4.96099e-06	0	0	0	0	2.16181e-05	2.40324e-05	0	0	0	0	0	0	0	2.50935e-05	0	0	0	0	2.68694e-05	0	0	0	3.04602e-06	0	0	2.35464e-06
Aquabacterium	3.84336e-06	0	0	0	4.54827e-06	0	0	0	0	0	1.74885e-05	0	0	5.03145e-06	0	0	4.03328e-06	0	0	1.34347e-05	0	0	0	0	0	0	2.35464e-06
Magnetospirillum	0	0	0	0	0	3.78317e-05	0	0	0	0	0	0	0	5.03145e-06	0	0	0	0	0	0	0	0	0	0	0	0	2.35464e-06
Oleispira	1.37038e-05	0	0	0	0	0	0	0	0	0	0	0	0	0	0	6.56289e-06	0	0	0	1.34347e-05	0	0	0	0	0	0	0
Dechloromonas	0	0	0	5.13455e-06	0	0	0	0	0	0	0	0	0	0	0	0	0	1.84592e-05	0	0	0	0	0	0	0	0	0
Azospirillum	0	0	5.89155e-06	0	0	0	0	0	0	0	0	0	0	5.03145e-06	0	2.18763e-06	0	0	0	0	0	0	0	3.04602e-06	0	0	0
Chelatococcus	0	0	0	0	0	0	0	0	0	0	0	0	0	0	0	1.53134e-05	0	0	0	0	0	0	0	0	0	0	0
Oceanisphaera	0	0	0	0	0	0	0	0	0	3.52867e-06	0	0	0	0	5.01869e-06	0	0	0	0	0	0	0	0	0	0	0	0
Arenibacter	1.95769e-06	0	0	0	0	0	2.67027e-06	0	0	0	0	0	0	0	0	0	0	0	0	0	3.15612e-06	0	0	0	0	0	0
Shinella	0	0	0	0	0	0	2.67027e-06	0	0	0	0	0	0	5.03145e-06	0	0	0	0	0	0	0	0	0	0	0	0	0
Bradyrhizobium	0	0	0	0	0	0	0	0	4.41753e-06	0	0	0	0	0	0	0	0	0	0	0	3.15612e-06	0	0	0	0	0	0
Rhizobium	9.78843e-07	0	0	5.13455e-06	0	0	0	0	0	0	0	0	0	0	0	0	0	0	0	0	0	0	0	0	0	0	0
Aminobacter	0	0	0	5.13455e-06	0	0	0	0	0	0	0	0	0	0	0	0	0	0	0	0	0	0	0	0	0	0	0
Azospira	0	0	0	5.13455e-06	0	0	0	0	0	0	0	0	0	0	0	0	0	0	0	0	0	0	0	0	0	0	0
Acidovorax	9.78843e-07	0	2.94578e-06	0	0	0	0	0	0	0	0	0	0	0	0	0	0	0	0	0	0	0	0	0	0	0	0
Ensifer	1.04562e-06	0	0	0	0	0	2.67027e-06	0	0	0	0	0	0	0	0	0	0	0	0	0	0	0	0	0	0	0	0
Thioalkalivibrio	0	0	0	0	0	0	0	0	0	0	0	0	0	0	0	0	0	0	0	0	3.15612e-06	0	0	0	0	0	0
Thauera	0	0	2.94578e-06	0	0	0	0	0	0	0	0	0	0	0	0	0	0	0	0	0	0	0	0	0	0	0	0
Hyphomicrobium	0	0	0	0	0	0	2.67027e-06	0	0	0	0	0	0	0	0	0	0	0	0	0	0	0	0	0	0	0	0
Pseudovibrio	9.78843e-07	0	0	0	0	0	0	0	0	0	0	0	0	0	0	0	0	0	0	0	0	0	0	0	0	0	0

## Sheet: Sheet 5
	IN	PCa1	PCa2	PCa3	PCa4	PCa5	PMa1	PMa2	PMa3	PMa4	PMa5	PGa1	PGa2	PGa3	PCb1	PCb2	PCb3	PCb4	PCb5	PMb1	PMb2	PMb3	PMb4	PMb5	PGb1	PGb2	PGb3
Arcobacter	6.88481e-05	2.19565e-05	0.00192573	7.19904e-05	4.018e-06	7.47296e-05	0.00140457	0.00999996	0.000387636	0.0293992	0.000280707	0.000487987	9.61261e-05	2.12354e-05	1.92562e-05	0.000545466	0	3.18918e-05	7.79956e-06	0.000725828	2.52477e-05	6.33314e-06	1.88709e-05	2.26325e-05	0.000481546	0.000114919	5.46233e-05
Vibrio	0.000349703	0.000358624	0.000196074	3.59952e-05	0.000711186	0.00325074	0.00851407	0.00894773	1.21136e-05	3.87257e-05	4.67845e-05	0.00244903	0.000177464	4.67179e-05	0.00101288	6.52188e-05	8.9121e-06	4.14594e-05	1.03994e-05	0.0021351	9.15228e-05	1.26663e-05	3.14515e-05	6.78976e-06	0.000386957	7.18246e-06	2.341e-05
Coraliomargarita	2.40255e-05	1.82971e-05	9.80372e-05	1.79976e-05	3.0135e-05	0	1.35872e-05	2.2388e-05	3.93692e-05	3.22714e-05	1.07964e-05	0.000136394	0.000207041	8.49416e-06	6.162e-05	1.1858e-05	0.00014705	2.23243e-05	1.29993e-05	9.00662e-05	3.15596e-05	6.33314e-06	9.43545e-05	2.26325e-06	0.00473807	9.3372e-05	0
Desulfobulbus	1.5879e-05	5.48914e-06	0.00151257	0	1.0045e-05	5.33783e-06	3.56664e-05	3.73133e-05	0.00177464	0	3.59881e-06	5.15265e-05	0	4.24708e-06	0	0	4.45605e-06	6.37836e-06	0	1.0596e-05	0	0	1.88709e-05	0	2.57971e-05	4.30948e-05	3.90166e-06
Pseudomonas	3.55923e-05	1.46377e-05	0	0	0.000245098	2.13513e-05	0	2.2388e-05	2.42272e-05	1.29086e-05	0.00039227	0	7.39432e-06	8.06945e-05	1.15537e-05	0	8.9121e-06	0.000102054	1.29993e-05	5.29801e-06	5.99632e-05	0	1.25806e-05	5.88446e-05	0	0	3.90166e-05
Spirochaeta	4.49785e-06	5.48914e-06	0.000469178	0	0	1.60135e-05	3.3968e-06	0	2.72556e-05	0	0	0	0	8.49416e-06	0	0	0	9.56755e-06	0	5.29801e-06	0	0	0	0	0	0	0
Desulfuromonas	1.07325e-06	1.82971e-06	0.000245093	0	0	0	8.49199e-06	0	5.75397e-05	0	3.59881e-06	3.03097e-06	0	0	0	0	4.45605e-06	3.18918e-06	0	0	0	2.11105e-06	0	4.5265e-06	0	0	3.90166e-06
Desulfovibrio	1.0342e-05	5.48914e-06	0.000154058	0	1.4063e-05	0	8.49199e-06	1.1194e-05	1.5142e-05	6.45428e-06	3.59881e-06	3.03097e-05	7.39432e-06	0	1.15537e-05	0	0	6.37836e-06	2.59985e-06	1.0596e-05	3.15596e-06	0	0	6.78976e-06	1.71981e-05	7.18246e-06	3.90166e-06
Methanolobus	1.18058e-05	1.46377e-05	5.60212e-05	0	4.018e-06	4.80405e-05	5.0952e-06	4.4776e-05	1.21136e-05	1.93628e-05	0	2.42478e-05	7.39432e-06	0	0	5.92898e-06	4.45605e-06	1.91351e-05	2.59985e-06	5.29801e-06	3.15596e-06	1.05552e-05	0	4.5265e-06	8.59904e-06	0	1.56066e-05
Dehalogenimonas	1.07325e-06	1.82971e-06	2.80106e-05	0	0	1.06757e-05	5.0952e-06	0	0.000263471	0	0	3.03097e-06	0	0	0	0	0	0	0	5.29801e-06	0	0	0	0	0	0	0
Pelobacter	0	0	0.000287109	0	0	0	1.6984e-06	0	6.05681e-06	0	0	3.03097e-06	0	0	0	0	0	0	0	0	0	0	0	0	8.59904e-06	0	0
Rhodovulum	0	3.65942e-05	0	0	2.8126e-05	1.06757e-05	0	0	3.0284e-06	0	1.43952e-05	0	7.39432e-06	1.27412e-05	1.5405e-05	3.55739e-05	0	6.37836e-06	6.23965e-05	0	0	0	6.2903e-06	9.05301e-06	0	2.15474e-05	1.56066e-05
Halothiobacillus	1.07325e-06	2.5616e-05	0.000112042	0	0	0	3.3968e-06	3.73133e-06	2.42272e-05	0	0	3.03097e-06	0	4.24708e-06	4.23637e-05	0	0	9.56755e-06	0	0	0	4.22209e-06	0	0	0	0	0
Sphingomonas	1.08541e-05	1.82971e-06	0	0	2.009e-06	5.33783e-06	1.6984e-06	3.73133e-06	3.0284e-06	0	0	0	7.39432e-06	4.24708e-06	0	5.92898e-06	0	0	2.59985e-06	5.29801e-06	0.000110459	0	0	2.26325e-06	0	0	0
Methanothrix	4.293e-06	1.2808e-05	0	0	4.018e-06	2.13513e-05	3.3968e-06	1.86566e-05	3.63408e-05	0	0	6.06195e-06	2.2183e-05	0	3.85125e-06	0	4.45605e-06	9.56755e-06	2.59985e-06	5.29801e-06	6.31192e-06	0	0	0	0	0	3.90166e-06
Desulfocapsa	0	0	0.000119045	0	0	0	1.6984e-06	0	3.0284e-06	0	3.59881e-06	0	0	0	0	0	0	0	0	0	3.15596e-06	0	0	0	0	0	0
Desulfobacterium	0	0	7.00265e-05	0	0	0	0	3.73133e-06	6.05681e-06	0	0	9.09292e-06	0	4.24708e-06	0	0	0	0	2.59985e-06	5.29801e-06	0	0	6.2903e-06	2.26325e-06	1.71981e-05	0	0
Defluviimonas	3.21975e-06	0	0	0	7.0315e-05	1.06757e-05	1.6984e-06	3.73133e-06	3.0284e-06	0	1.43952e-05	0	0	0	3.85125e-06	0	0	0	0	0	0	2.11105e-06	0	2.26325e-06	0	7.18246e-06	3.90166e-06
Methylobacterium	7.83687e-05	0	7.00265e-06	0	4.018e-06	0	1.6984e-06	0	3.0284e-06	0	0	0	1.47886e-05	0	0	0	0	0	0	5.29801e-06	0	4.22209e-06	0	2.26325e-06	0	0	3.90166e-06
Teredinibacter	2.3172e-06	0	7.00265e-06	0	2.009e-06	5.33783e-06	6.79359e-06	3.73133e-06	3.0284e-06	0	3.59881e-06	3.33407e-05	0	4.24708e-06	0	0	0	3.18918e-06	0	1.0596e-05	0	0	0	0	1.71981e-05	0	0
Desulfomonile	0	0	0	0	0	0	1.6984e-06	0	5.45113e-05	0	0	0	0	4.24708e-06	0	0	4.45605e-06	0	0	1.0596e-05	0	0	0	0	0	7.18246e-06	0
Sedimenticola	1.24395e-06	1.82971e-06	2.1008e-05	0	0	0	1.6984e-06	0	6.05681e-06	0	0	0	1.47886e-05	0	0	0	0	0	0	5.29801e-06	0	0	0	0	0	0	0
Methanosarcina	2.1465e-06	0	0	0	2.009e-06	0	0	0	6.05681e-06	6.45428e-06	3.59881e-06	3.03097e-06	0	0	3.85125e-06	0	0	6.37836e-06	0	0	0	0	1.25806e-05	0	0	0	0
Cupriavidus	0	0	0	0	0	0	0	0	3.0284e-06	0	0	0	0	0	0	0	4.45605e-06	0	0	0	6.31192e-06	2.11105e-06	6.2903e-06	2.26325e-06	0	7.18246e-06	3.90166e-06
Magnetococcus	0	0	7.00265e-06	0	0	0	0	0	0	0	0	0	7.39432e-06	0	3.85125e-06	0	4.45605e-06	0	0	0	3.15596e-06	0	6.2903e-06	0	0	0	0
Paenibacillus	0	0	0	0	0	1.60135e-05	0	0	3.0284e-06	0	0	0	0	0	0	0	0	0	0	0	3.15596e-06	0	0	0	0	0	3.90166e-06
Desulfomicrobium	1.07325e-06	1.82971e-06	0	0	0	0	0	0	0	0	0	0	0	4.24708e-06	0	0	0	6.37836e-06	0	0	0	2.11105e-06	0	0	8.59904e-06	0	0
Dechloromonas	1.24395e-06	0	0	0	0	0	0	0	0	0	0	0	1.47886e-05	0	0	0	0	0	0	5.29801e-06	0	2.11105e-06	0	0	0	0	0
Bradyrhizobium	0	0	0	0	0	5.33783e-06	0	0	0	0	0	0	7.39432e-06	4.24708e-06	0	0	4.45605e-06	0	0	0	0	0	0	0	0	0	0
Pantoea	0	0	0	0	0	2.13513e-05	0	0	0	0	0	0	0	0	0	0	0	0	0	0	0	0	0	0	0	0	0
Methanolacinia	0	0	0	0	0	0	0	0	0	0	0	0	0	0	0	0	0	1.91351e-05	0	0	0	0	0	0	0	0	0
Desulfatibacillum	0	0	1.40053e-05	0	0	0	0	0	0	0	0	3.03097e-06	0	0	0	0	0	0	0	0	0	0	0	0	0	0	0
Azotobacter	0	0	0	0	1.6072e-05	0	0	0	0	0	0	0	0	0	0	0	0	0	0	0	0	0	0	0	0	0	0
Rhizobium	3.73184e-06	0	0	0	0	0	0	0	0	0	0	0	0	0	0	0	0	0	0	0	6.31192e-06	0	0	2.26325e-06	0	0	0
Klebsiella	0	0	0	0	0	0	0	0	0	0	0	0	0	0	0	0	0	0	0	0	3.15596e-06	0	0	0	8.59904e-06	0	0
Azospirillum	0	1.82971e-06	0	0	0	0	0	0	6.05681e-06	0	3.59881e-06	0	0	0	0	0	0	0	0	0	0	0	0	0	0	0	0
Sulfurospirillum	3.21975e-06	0	0	0	0	0	3.3968e-06	3.73133e-06	0	0	0	0	0	0	0	0	0	0	0	0	0	0	0	0	0	0	0
Confluentimicrobium	0	0	0	0	0	0	0	0	0	6.45428e-06	0	0	0	0	3.85125e-06	0	0	0	0	0	0	0	0	0	0	0	0
Gynuella	0	0	0	0	1.0045e-05	0	0	0	0	0	0	0	0	0	0	0	0	0	0	0	0	0	0	0	0	0	0
Ensifer	0	0	7.00265e-06	0	0	0	0	0	3.0284e-06	0	0	0	0	0	0	0	0	0	0	0	0	0	0	0	0	0	0
Alkaliphilus	1.24395e-06	0	7.00265e-06	0	0	0	1.6984e-06	0	0	0	0	0	0	0	0	0	0	0	0	0	0	0	0	0	0	0	0
Sagittula	1.24395e-06	0	0	0	0	0	3.3968e-06	0	0	0	0	0	0	0	0	0	0	0	0	5.29801e-06	0	0	0	0	0	0	0
Treponema	0	0	0	0	0	0	0	0	0	0	0	0	0	0	0	0	0	9.56755e-06	0	0	0	0	0	0	0	0	0
Ilyobacter	0	0	0	0	0	0	1.6984e-06	0	6.05681e-06	0	0	0	0	0	0	0	0	0	0	0	0	0	0	0	0	0	0
Methylomonas	0	0	0	0	0	0	0	0	0	0	0	0	7.39432e-06	0	0	0	0	0	0	0	0	0	0	0	0	0	0
Martelella	0	0	0	0	0	0	0	0	3.0284e-06	0	0	0	0	4.24708e-06	0	0	0	0	0	0	0	0	0	0	0	0	0
Acidiferrobacter	0	0	7.00265e-06	0	0	0	0	0	0	0	0	0	0	0	0	0	0	0	0	0	0	0	0	0	0	0	0
Hyphomicrobium	3.73184e-06	0	0	0	0	0	0	0	0	0	0	0	0	0	0	0	0	0	0	0	0	0	0	2.26325e-06	0	0	0
Cellulosilyticum	0	0	0	0	0	0	0	0	0	0	3.59881e-06	0	0	0	0	0	0	0	0	0	0	0	0	2.26325e-06	0	0	0
Azospira	0	0	0	0	0	0	0	0	0	0	0	0	0	0	0	0	0	0	0	5.29801e-06	0	0	0	0	0	0	0
Paludibacter	0	0	0	0	0	0	0	0	0	0	0	0	0	4.24708e-06	0	0	0	0	0	0	0	0	0	0	0	0	0
Marichromatium	0	0	0	0	0	0	0	0	0	0	0	0	0	4.24708e-06	0	0	0	0	0	0	0	0	0	0	0	0	0
Fibrobacter	1.07325e-06	0	0	0	0	0	0	0	0	0	0	0	0	0	0	0	0	0	2.59985e-06	0	0	0	0	0	0	0	0
Burkholderia	0	0	0	0	0	0	0	0	0	0	3.59881e-06	0	0	0	0	0	0	0	0	0	0	0	0	0	0	0	0
Tolumonas	0	0	0	0	0	0	0	0	0	0	0	3.03097e-06	0	0	0	0	0	0	0	0	0	0	0	0	0	0	0
Methanobacterium	0	0	0	0	0	0	0	0	0	0	0	0	0	0	0	0	0	0	2.59985e-06	0	0	0	0	0	0	0	0
Mesorhizobium	0	0	0	0	0	0	0	0	0	0	0	0	0	0	0	0	0	0	0	0	0	0	0	2.26325e-06	0	0	0
Serratia	0	0	0	0	2.009e-06	0	0	0	0	0	0	0	0	0	0	0	0	0	0	0	0	0	0	0	0	0	0
Methyloversatilis	0	0	0	0	2.009e-06	0	0	0	0	0	0	0	0	0	0	0	0	0	0	0	0	0	0	0	0	0	0
Rhodobacter	1.07325e-06	0	0	0	0	0	0	0	0	0	0	0	0	0	0	0	0	0	0	0	0	0	0	0	0	0	0
Methanococcus	1.07325e-06	0	0	0	0	0	0	0	0	0	0	0	0	0	0	0	0	0	0	0	0	0	0	0	0	0	0
Sulfuricurvum	1.07325e-06	0	0	0	0	0	0	0	0	0	0	0	0	0	0	0	0	0	0	0	0	0	0	0	0	0	0
Azoarcus	1.07325e-06	0	0	0	0	0	0	0	0	0	0	0	0	0	0	0	0	0	0	0	0	0	0	0	0	0	0

## Sheet: Sheet 6
	IN	PCa1	PCa2	PCa3	PCa4	PCa5	PMa1	PMa2	PMa3	PMa4	PMa5	PGa1	PGa2	PGa3	PCb1	PCb2	PCb3	PCb4	PCb5	PMb1	PMb2	PMb3	PMb4	PMb5	PGb1	PGb2	PGb3
Arcobacter	0.0131968	0.000488972	0.0118626	0.00860551	0.000127351	0.00208615	0.000555416	0.00266474	0.000985109	0.000444612	0.0322496	0.00320057	0.00645202	0.00234465	0.000607262	0.00297955	0.000350896	0.00105832	0.00247556	0.00994169	4.10295e-05	7.71879e-05	0.00281525	0.00138289	0.0029253	0.000952106	0.000256655
Desulfobulbus	9.03809e-05	0.00121582	0.00299291	0.000585339	0.00286086	0.000880938	0.00122298	0.00241374	0.00241639	0.00145028	0.00034977	0.00322168	0.000655475	0.000301887	0.00105393	0.00281548	0.00133905	0.00022151	0.00104924	0.00122256	0.000826903	0.00177018	0.000167999	0.000304602	0.00122482	0.000379969	0.00238289
Spirochaeta	9.98016e-05	0.00183695	9.13191e-05	0.000138633	0.000113707	0.000270226	0.000883859	4.60159e-05	2.65052e-05	0.000232892	6.12097e-05	0.00366483	0.00027393	0.00052327	0.000316178	4.81278e-05	0.000149231	0.000547622	8.74369e-05	0.000806083	9.15274e-05	0.000180105	0.000183271	0.000112703	0.00196209	0.000262048	5.88659e-05
Vibrio	0.00607995	0.000647557	0.000329927	0.000189978	9.09653e-06	0.000508026	0.000168227	8.36652e-06	1.76701e-05	3.88154e-05	0.000629585	0.000984792	0.000381545	0.000211321	0.000205766	3.06268e-05	3.62995e-05	3.07653e-05	0.000131155	0.000282129	6.94346e-05	2.05834e-05	0.00011709	0.000115749	0.000582681	4.36746e-05	3.06103e-05
Halothiobacillus	1.23754e-05	1.32155e-05	0.00256872	7.18837e-05	0.000172834	4.86408e-05	0.000149535	0.000343027	0.000141361	0.000998613	8.74424e-06	0.000815971	4.8916e-06	2.51572e-05	1.00374e-05	0.00320925	0.000641292	2.46122e-05	0.000120226	0	3.47173e-05	0.000180105	2.54544e-05	3.04602e-06	0.000154589	3.49397e-05	0.00132331
Desulfovibrio	0.000250484	0.000845789	0.000232716	0.000492917	5.00309e-05	4.32362e-05	5.34054e-05	4.18326e-05	3.97577e-05	0.000179962	1.74885e-05	0.00068232	0.000650583	0.000367296	7.02617e-05	0.000122507	0.000153265	0.000842968	0.000169409	0.00022839	4.41856e-05	0.000113209	0.00369088	0.000188853	0.000332961	0.000458583	2.11917e-05
Coraliomargarita	0.00039166	0.00029074	0.000114885	0.000215651	4.54827e-06	9.72815e-05	0.000667567	2.09163e-05	2.20876e-05	9.88027e-05	0.000393491	0.00165304	0.000127182	0.000171069	0.000255953	0.000142196	1.61331e-05	0	0.000251381	0.000295564	9.46835e-05	0.000164668	0.000167999	7.91966e-05	0.000677813	2.62048e-05	0.000306103
Desulfuromonas	2.22869e-05	0.000171801	0.00243616	0.000143767	4.09344e-05	0.000378317	0.000157546	8.78485e-05	5.74279e-05	4.94014e-05	2.62327e-05	0.000211027	5.38076e-05	0.000322013	4.51683e-05	0.000658476	1.61331e-05	0.000116908	0.000174874	0.000241825	0.000138869	0.000108063	3.05452e-05	3.95983e-05	0.000309178	3.49397e-05	0.000539212
Dehalogenimonas	0.000252588	0	8.83733e-06	0.000533993	0.000686788	2.16181e-05	6.9427e-05	0.000242629	0.000468258	0.00042344	0.000157396	3.51711e-05	0.000890272	5.03145e-05	0.000140523	1.09381e-05	0.000488027	0.000203051	0.000191268	4.03042e-05	2.52489e-05	0.000169813	0.000157817	9.74727e-05	3.56744e-05	0.000244578	3.53195e-05
Pelobacter	1.04562e-06	3.96464e-05	0.00326098	9.75565e-05	4.54827e-06	7.56634e-05	8.54486e-05	5.01991e-05	3.97577e-05	2.1172e-05	1.74885e-05	0.000211027	5.38076e-05	8.55346e-05	3.01122e-05	0.000647538	1.20998e-05	1.84592e-05	5.46481e-05	4.03042e-05	0.000104152	0.000159522	1.52726e-05	1.52301e-05	0.000297286	1.74698e-05	4.94474e-05
Desulfomonile	0.000104015	2.64309e-05	3.53493e-05	4.6211e-05	0.0001319	1.08091e-05	5.34054e-05	0.000150597	0.000128108	0.000250535	1.74885e-05	1.40685e-05	9.7832e-05	1.50943e-05	2.00748e-05	0.000113757	0.000221831	7.99897e-05	3.82537e-05	2.68694e-05	1.26245e-05	4.63127e-05	2.03635e-05	2.43682e-05	1.18915e-05	0.000100452	1.64825e-05
Desulfomicrobium	1.43278e-05	0	5.89155e-06	0	5.91275e-05	6.48543e-05	2.67027e-06	0	0	0.000490485	2.62327e-05	0.000119582	0.000401111	1.50943e-05	0	2.18763e-05	6.04992e-05	9.84488e-05	3.27889e-05	1.34347e-05	0	0	5.09087e-05	4.26443e-05	0	0.000109187	1.17732e-05
Methanothrix	3.84336e-06	3.96464e-05	3.82951e-05	5.13455e-06	0.000191027	4.32362e-05	8.01081e-06	8.36652e-06	1.76701e-05	0.000243478	3.4977e-05	0.000569773	0	0	5.01869e-06	2.62515e-05	2.01664e-05	1.84592e-05	0.000109296	0	1.26245e-05	1.02917e-05	0	0	2.37829e-05	0	4.70927e-06
Sedimenticola	2.79773e-06	2.64309e-05	5.3024e-05	1.02691e-05	0.000154641	0.000102686	1.33513e-05	0.000255179	6.62629e-05	9.17454e-05	0	7.03423e-06	5.38076e-05	2.51572e-05	5.01869e-06	4.37526e-05	8.06657e-06	6.15305e-06	7.65073e-05	0	0.000205148	0.000113209	3.05452e-05	0	3.56744e-05	2.18373e-05	1.88371e-05
Magnetococcus	0.000128272	2.64309e-05	8.83733e-06	0.00011296	8.64171e-05	7.02589e-05	2.9373e-05	1.25498e-05	4.41753e-06	0.000119975	0	5.62738e-05	2.93496e-05	2.51572e-05	1.00374e-05	8.75051e-06	8.87322e-05	1.84592e-05	1.63944e-05	2.68694e-05	3.15612e-06	1.54376e-05	2.54544e-05	5.78744e-05	2.37829e-05	0.000104819	2.5901e-05
Teredinibacter	3.00331e-06	6.60773e-05	2.06204e-05	1.02691e-05	0	5.40453e-06	2.13622e-05	0	0	7.05734e-06	8.74424e-06	0.000260266	2.93496e-05	0.000327044	1.50561e-05	1.7501e-05	4.03328e-06	6.15305e-06	5.46481e-06	0	3.15612e-06	1.54376e-05	5.09087e-06	3.65523e-05	0	4.36746e-06	4.70927e-05
Desulfobacterium	2.67135e-05	3.96464e-05	5.89155e-06	5.13455e-06	0	5.40453e-06	8.01081e-06	1.25498e-05	8.83505e-06	2.47007e-05	8.74424e-06	0.000344677	0	2.01258e-05	3.01122e-05	4.37526e-06	1.20998e-05	7.99897e-05	1.63944e-05	0.000120912	1.57806e-05	0	3.05452e-05	6.09204e-06	1.18915e-05	3.49397e-05	0
Desulfocapsa	1.1435e-05	3.96464e-05	3.24035e-05	1.02691e-05	0	5.40453e-06	1.86919e-05	1.25498e-05	4.41753e-06	7.05734e-06	8.74424e-06	0.000147719	3.42412e-05	1.50943e-05	1.50561e-05	0.000118132	0	1.23061e-05	1.09296e-05	4.03042e-05	9.46835e-06	3.6021e-05	0	0	0.000118915	1.31024e-05	2.35464e-06
Pseudomonas	1.63575e-05	0	0.000114885	5.13455e-06	9.09653e-06	9.1877e-05	1.06811e-05	0	0	7.05734e-06	0	7.03423e-06	6.84824e-05	7.04403e-05	1.50561e-05	3.93773e-05	0	6.15305e-06	3.27889e-05	0	9.46835e-06	1.02917e-05	0	2.43682e-05	2.37829e-05	3.05722e-05	3.53195e-05
Methanolobus	4.04863e-05	6.60773e-05	1.17831e-05	5.13455e-06	6.8224e-05	0	3.47135e-05	1.25498e-05	4.41753e-06	7.05734e-06	0	9.1445e-05	9.7832e-06	0	6.02243e-05	1.53134e-05	0	0	3.27889e-05	4.03042e-05	0	1.54376e-05	5.09087e-06	0	3.56744e-05	0	7.06391e-06
Sphingomonas	1.53119e-05	0	4.41867e-05	3.08073e-05	9.09653e-06	3.78317e-05	8.01081e-06	1.25498e-05	4.41753e-06	0.000109389	8.74424e-06	1.40685e-05	0	7.54717e-05	1.00374e-05	6.56289e-06	8.06657e-06	1.23061e-05	2.18592e-05	0	2.20928e-05	2.05834e-05	5.09087e-06	2.74142e-05	0	2.18373e-05	3.53195e-05
Fibrobacter	0	0	2.94578e-05	1.02691e-05	0	9.72815e-05	0	0	0	7.05734e-06	8.74424e-06	0.00023213	1.46748e-05	3.52201e-05	5.01869e-06	1.09381e-05	0	0	1.63944e-05	0	0	5.14586e-06	2.03635e-05	2.74142e-05	0	4.36746e-06	4.70927e-06
Methanosarcina	1.08236e-05	1.32155e-05	5.89155e-06	0	1.36448e-05	2.16181e-05	5.34054e-06	1.6733e-05	4.41753e-06	7.05734e-06	0	0.000105513	0	0	1.50561e-05	1.31258e-05	4.03328e-06	0	6.01129e-05	1.34347e-05	9.46835e-06	0	0	0	0	1.31024e-05	0
Denitrovibrio	0.000176371	0	0	5.13455e-06	4.54827e-06	0	0	0	0	1.41147e-05	8.74424e-06	5.62738e-05	9.7832e-06	5.03145e-06	5.01869e-06	0	0	1.23061e-05	5.46481e-06	0	0	1.02917e-05	0	3.04602e-06	0	0	4.70927e-06
Alkaliphilus	7.68671e-06	0	2.94578e-06	0	1.36448e-05	5.40453e-06	0	0	4.41753e-06	3.52867e-06	0	7.03423e-06	0	5.03145e-05	0	5.25031e-05	0	0	5.46481e-06	0	0	2.05834e-05	5.09087e-06	1.21841e-05	3.56744e-05	4.36746e-06	2.11917e-05
Desulfatibacillum	9.62253e-05	0	0	0	0	0	0	0	4.41753e-06	1.41147e-05	0	2.11027e-05	4.8916e-06	5.03145e-06	5.01869e-06	0	0	6.15305e-05	5.46481e-06	0	0	0	0	3.04602e-06	0	0	2.35464e-06
Defluviimonas	3.13686e-06	1.32155e-05	0	0	0	0	9.07892e-05	0	0	0	8.74424e-06	2.11027e-05	4.8916e-06	5.03145e-06	5.01869e-06	0	0	6.15305e-06	0	4.03042e-05	1.26245e-05	5.14586e-06	0	3.04602e-06	0	0	2.35464e-06
Sulfuricurvum	5.59547e-06	0	0	0	0	9.72815e-05	0	0	0	0	8.74424e-06	0	0	1.50943e-05	0	2.18763e-06	0	6.15305e-06	3.27889e-05	0	0	0	0	3.04602e-06	0	0	2.35464e-05
Sulfurospirillum	1.069e-05	0	2.94578e-06	5.13455e-06	0	0	5.34054e-06	0	0	3.52867e-06	8.74424e-06	7.73765e-05	1.46748e-05	2.01258e-05	1.50561e-05	0	4.03328e-06	0	0	1.34347e-05	0	0	0	9.13807e-06	0	0	0
Rhodovulum	5.73426e-06	0	2.94578e-06	0	9.09653e-06	7.02589e-05	0	0	0	3.52867e-06	0	7.03423e-06	0	0	0	3.50021e-05	0	0	0	0	3.15612e-06	5.14586e-06	0	6.09204e-06	0	4.36746e-06	0
Methylobacterium	8.3932e-06	0	1.17831e-05	1.02691e-05	1.36448e-05	1.08091e-05	0	4.18326e-06	0	0	0	7.03423e-06	4.8916e-06	3.52201e-05	0	0	0	0	1.09296e-05	0	0	0	0	1.52301e-05	0	4.36746e-06	9.41855e-06
Azoarcus	0	0	5.89155e-06	5.13455e-06	0	4.32362e-05	0	0	0	0	0	0	0	5.03145e-06	0	1.09381e-05	0	6.15305e-06	1.09296e-05	0	0	0	5.09087e-06	3.04602e-06	0	4.36746e-06	2.5901e-05
Gynuella	0	0	0	0	0	0	0	0	0	0	8.74424e-05	0	0	0	0	0	0	0	0	0	0	0	0	0	0	4.36746e-06	0
Prosthecochloris	2.9023e-05	0	0	0	0	0	0	1.25498e-05	8.83505e-06	0	0	0	1.46748e-05	5.03145e-06	0	0	0	0	0	0	0	0	5.09087e-06	0	0	0	0
Desulfarculus	7.31934e-06	0	0	0	0	0	0	0	0	3.52867e-06	0	0	0	0	0	0	0	3.07653e-05	2.18592e-05	0	0	0	0	3.04602e-06	0	0	0
Methanobacterium	7.18579e-06	0	2.94578e-06	0	0	0	0	0	1.32526e-05	1.41147e-05	0	7.03423e-06	4.8916e-06	0	0	1.09381e-05	0	0	5.46481e-06	0	0	0	0	0	0	0	0
Treponema	0	0	0	0	0	1.62136e-05	0	0	0	0	0	0	0	0	0	0	0	3.07653e-05	0	0	0	0	0	1.21841e-05	0	0	0
Methanolacinia	0	0	0	0	9.09653e-06	0	0	0	0	2.82293e-05	0	7.03423e-06	4.8916e-06	0	0	2.18763e-06	0	0	0	0	0	0	0	3.04602e-06	0	0	0
Geobacter	0	0	0	5.13455e-06	0	0	0	0	0	0	8.74424e-06	0	0	0	0	0	0	0	0	4.03042e-05	0	0	0	0	0	0	0
Paenibacillus	5.2281e-06	0	0	1.54037e-05	0	0	0	0	0	0	8.74424e-06	0	4.8916e-06	5.03145e-06	5.01869e-06	0	0	0	0	0	0	0	0	0	0	8.73492e-06	0
Magnetospirillum	0	0	0	0	0	3.78317e-05	0	0	0	0	0	0	0	5.03145e-06	0	0	0	0	0	0	0	0	0	0	0	0	2.35464e-06
Methanococcus	0	0	0	0	9.09653e-06	0	0	0	4.41753e-06	1.76433e-05	0	7.03423e-06	0	0	0	4.37526e-06	0	0	0	0	0	0	0	0	0	0	0
Martelella	0	0	2.94578e-06	0	0	0	0	0	0	0	8.74424e-06	0	0	1.00629e-05	0	2.18763e-06	0	0	0	0	0	0	0	6.09204e-06	0	4.36746e-06	2.35464e-06
Marichromatium	1.04562e-06	0	0	0	0	0	0	0	0	0	0	0	0	0	0	0	0	0	0	2.68694e-05	0	0	5.09087e-06	0	0	0	0
Dechloromonas	0	0	0	5.13455e-06	0	0	0	0	0	0	0	0	0	0	0	0	0	1.84592e-05	0	0	0	0	0	0	0	0	0
Cellulosilyticum	1.04562e-06	0	2.94578e-06	0	0	0	0	0	8.83505e-06	0	0	0	9.7832e-06	0	0	0	0	0	0	0	0	0	0	0	0	0	0
Anaeromyxobacter	0	0	0	0	4.54827e-06	0	5.34054e-06	0	0	3.52867e-06	0	0	0	0	0	0	0	0	0	0	0	0	0	0	0	4.36746e-06	0
Paludibacter	2.79773e-06	0	0	0	0	0	2.67027e-06	0	0	3.52867e-06	0	0	0	0	0	0	0	0	5.46481e-06	0	0	0	0	3.04602e-06	0	0	0
Azospirillum	0	0	5.89155e-06	0	0	0	0	0	0	0	0	0	0	5.03145e-06	0	2.18763e-06	0	0	0	0	0	0	0	3.04602e-06	0	0	0
Rhodoferax	0	0	0	0	0	0	0	0	0	0	0	0	0	0	0	0	0	0	0	1.34347e-05	0	0	0	0	0	0	2.35464e-06
Methyloversatilis	5.59547e-06	0	0	0	0	0	0	0	0	0	0	0	0	5.03145e-06	0	2.18763e-06	0	0	0	0	0	0	0	0	0	0	2.35464e-06
Syntrophobacter	0	0	0	5.13455e-06	0	0	0	0	0	0	8.74424e-06	0	0	0	0	0	0	0	0	0	0	0	0	0	0	0	0
Klebsiella	0	0	2.94578e-06	0	0	0	0	0	0	0	0	0	0	0	0	2.18763e-06	0	0	5.46481e-06	0	0	0	0	3.04602e-06	0	0	0
Ilyobacter	0	0	0	0	0	0	1.33513e-05	0	0	0	0	0	0	0	0	0	0	0	0	0	0	0	0	0	0	0	0
Aquaspirillum	0	1.32155e-05	0	0	0	0	0	0	0	0	0	0	0	0	0	0	0	0	0	0	0	0	0	0	0	0	0
Cupriavidus	0	0	0	0	0	0	5.34054e-06	0	0	0	0	0	0	0	0	0	0	0	0	0	0	0	0	0	0	0	4.70927e-06
Pantoea	0	0	0	0	0	5.40453e-06	0	0	4.41753e-06	0	0	0	0	0	0	0	0	0	0	0	0	0	0	0	0	0	0
Sideroxydans	0	0	0	0	0	0	0	0	0	0	8.74424e-06	0	0	0	0	0	0	0	0	0	0	0	0	0	0	0	0
Sagittula	0	0	2.94578e-06	0	0	0	0	0	0	0	0	0	0	0	5.01869e-06	0	0	0	0	0	0	0	0	0	0	0	0
Desulfotomaculum	0	0	0	0	0	0	2.67027e-06	0	0	0	0	0	0	5.03145e-06	0	0	0	0	0	0	0	0	0	0	0	0	0
Bradyrhizobium	0	0	0	0	0	0	0	0	4.41753e-06	0	0	0	0	0	0	0	0	0	0	0	3.15612e-06	0	0	0	0	0	0
Dehalobacter	0	0	2.94578e-06	0	0	0	0	0	4.41753e-06	0	0	0	0	0	0	0	0	0	0	0	0	0	0	0	0	0	0
Serratia	0	0	0	0	0	0	0	0	0	0	0	7.03423e-06	0	0	0	0	0	0	0	0	0	0	0	0	0	0	0
Methylosinus	0	0	2.94578e-06	0	0	0	0	0	0	3.52867e-06	0	0	0	0	0	0	0	0	0	0	0	0	0	0	0	0	0
Rhizobium	9.78843e-07	0	0	5.13455e-06	0	0	0	0	0	0	0	0	0	0	0	0	0	0	0	0	0	0	0	0	0	0	0
Herbaspirillum	0	0	0	0	0	0	0	0	0	0	0	0	0	0	0	0	0	0	0	0	0	5.14586e-06	0	0	0	0	0
Azospira	0	0	0	5.13455e-06	0	0	0	0	0	0	0	0	0	0	0	0	0	0	0	0	0	0	0	0	0	0	0
Ruminococcus	0	0	0	0	0	0	0	0	0	0	0	0	0	0	0	0	0	0	0	0	0	0	0	0	0	4.36746e-06	0
Desulfosporosinus	0	0	0	0	0	0	0	0	0	0	0	0	0	0	0	0	0	0	0	0	0	0	0	0	0	4.36746e-06	0
Mesorhizobium	0	0	0	0	0	0	0	4.18326e-06	0	0	0	0	0	0	0	0	0	0	0	0	0	0	0	0	0	0	0
Caldicellulosiruptor	0	0	0	0	0	0	0	4.18326e-06	0	0	0	0	0	0	0	0	0	0	0	0	0	0	0	0	0	0	0
Ensifer	1.04562e-06	0	0	0	0	0	2.67027e-06	0	0	0	0	0	0	0	0	0	0	0	0	0	0	0	0	0	0	0	0
Burkholderia	0	0	0	0	0	0	0	0	0	3.52867e-06	0	0	0	0	0	0	0	0	0	0	0	0	0	0	0	0	0
Acidiferrobacter	0	0	2.94578e-06	0	0	0	0	0	0	0	0	0	0	0	0	0	0	0	0	0	0	0	0	0	0	0	0
Hyphomicrobium	0	0	0	0	0	0	2.67027e-06	0	0	0	0	0	0	0	0	0	0	0	0	0	0	0	0	0	0	0	0

## Sheet: Sheet 7
	IN	PCa1	PCa2	PCa3	PCa4	PCa5	PMa1	PMa2	PMa3	PMa4	PMa5	PGa1	PGa2	PGa3	PCb1	PCb2	PCb3	PCb4	PCb5	PMb1	PMb2	PMb3	PMb4	PMb5	PGb1	PGb2	PGb3
Arcobacter	6.88481e-05	2.19565e-05	0.00192573	7.19904e-05	4.018e-06	7.47296e-05	0.00140457	0.00999996	0.000387636	0.0293992	0.000280707	0.000487987	9.61261e-05	2.12354e-05	1.92562e-05	0.000545466	0	3.18918e-05	7.79956e-06	0.000725828	2.52477e-05	6.33314e-06	1.88709e-05	2.26325e-05	0.000481546	0.000114919	5.46233e-05
Vibrio	0.000349703	0.000358624	0.000196074	3.59952e-05	0.000711186	0.00325074	0.00851407	0.00894773	1.21136e-05	3.87257e-05	4.67845e-05	0.00244903	0.000177464	4.67179e-05	0.00101288	6.52188e-05	8.9121e-06	4.14594e-05	1.03994e-05	0.0021351	9.15228e-05	1.26663e-05	3.14515e-05	6.78976e-06	0.000386957	7.18246e-06	2.341e-05
Alteromonas	0.00120035	0.00165955	2.80106e-05	1.79976e-05	0.000150675	2.13513e-05	0.00500518	0.00300372	0.000160505	0.00018072	0.000503833	0.00722887	0.000835558	0.000356755	0.000142496	0.000124509	0.000129225	7.33512e-05	2.59985e-06	0.00418543	8.20549e-05	0.000124552	1.88709e-05	0.000439071	0.00238193	1.43649e-05	0.000148263
Hyphomonas	0.000458213	0.00031837	2.1008e-05	0	0.0022099	0.00282371	4.246e-05	0.000264924	3.0284e-06	6.45428e-06	0.000453449	2.12168e-05	1.47886e-05	5.5212e-05	0.00400915	0.00317201	0	0	0.000748758	5.29801e-05	0.000463926	0.000122441	1.88709e-05	9.27934e-05	0.000232174	2.15474e-05	3.90166e-06
Tenacibaculum	0.000708564	0.000281776	7.00265e-06	1.79976e-05	0.000285278	0.00138784	0.000458568	0.000522386	0.000112051	8.39056e-05	0.000125958	0.00150639	0.00037711	0.000526638	0.00015405	8.89347e-05	0.000102489	0.000204108	0.000109194	0.000672848	0.000315596	0.000249103	0.000264192	0.000217272	0.00159942	0.000150832	0.000226296
Halomonas	0.000263467	0.000159185	0.000322122	1.79976e-05	0.00135407	0.000998174	0.000176633	0.000164178	0.000236215	1.29086e-05	0.00066218	0.000200044	7.39432e-05	0.000475673	8.47275e-05	5.92898e-05	3.11923e-05	0.000191351	0.000465374	0.00100132	8.83668e-05	6.12203e-05	3.14515e-05	0.00036891	0.000189179	2.87299e-05	0.00044479
Coraliomargarita	2.40255e-05	1.82971e-05	9.80372e-05	1.79976e-05	3.0135e-05	0	1.35872e-05	2.2388e-05	3.93692e-05	3.22714e-05	1.07964e-05	0.000136394	0.000207041	8.49416e-06	6.162e-05	1.1858e-05	0.00014705	2.23243e-05	1.29993e-05	9.00662e-05	3.15596e-05	6.33314e-06	9.43545e-05	2.26325e-06	0.00473807	9.3372e-05	0
Mycobacterium	9.24788e-05	3.11051e-05	0	0	0.00106879	0.00192162	3.56664e-05	1.49253e-05	7.57101e-05	0	0.000194335	1.21239e-05	4.43659e-05	0.000212354	3.85125e-06	0	6.23847e-05	0.000516648	0.000103994	5.29801e-06	3.15596e-06	8.86639e-05	1.88709e-05	0.000119952	8.59904e-06	4.30948e-05	0.000124853
Reinekea	8.12726e-05	1.2808e-05	0.000140053	1.79976e-05	4.018e-06	5.33783e-06	0.00207035	0.00169402	1.21136e-05	6.45428e-06	7.19761e-06	0.000130332	7.39432e-06	8.49416e-06	7.7025e-06	5.92898e-06	0	3.18918e-06	2.59985e-06	0.000180132	3.47155e-05	2.11105e-06	0	0	0.000111788	7.18246e-06	3.90166e-06
Alcanivorax	0.000421334	8.05073e-05	0	1.79976e-05	0.000154693	6.93918e-05	2.88728e-05	1.49253e-05	5.14829e-05	0	1.43952e-05	3.03097e-06	0.000414082	2.97295e-05	1.5405e-05	0	4.45605e-06	0.000159459	2.59985e-06	6.35762e-05	2.84036e-05	1.47773e-05	1.25806e-05	0.000547707	4.29952e-05	0	8.58366e-05
Marinobacter	7.67599e-05	9.69748e-05	0.000161061	0	9.0405e-05	8.00675e-05	4.75552e-05	0.000776117	8.78237e-05	7.09971e-05	5.03833e-05	6.36504e-05	4.43659e-05	2.12354e-05	0.000127091	0	4.45605e-06	3.5081e-05	0	0.000196026	3.78715e-05	1.05552e-05	3.14515e-05	2.03693e-05	5.15943e-05	7.18246e-06	1.1705e-05
Photobacterium	0.000131933	1.82971e-06	0.000455173	0	1.0045e-05	0	4.58568e-05	0.000220148	3.33124e-05	0	3.59881e-06	0.000115177	5.17602e-05	1.27412e-05	3.85125e-06	5.92898e-06	0	1.27567e-05	1.03994e-05	0.000386755	1.26238e-05	4.22209e-06	0	6.78976e-06	4.29952e-05	7.18246e-06	3.90166e-06
Pseudomonas	3.55923e-05	1.46377e-05	0	0	0.000245098	2.13513e-05	0	2.2388e-05	2.42272e-05	1.29086e-05	0.00039227	0	7.39432e-06	8.06945e-05	1.15537e-05	0	8.9121e-06	0.000102054	1.29993e-05	5.29801e-06	5.99632e-05	0	1.25806e-05	5.88446e-05	0	0	3.90166e-05
Nocardioides	0	0	0	0	1.2054e-05	0	0	0	0	0	0.000680174	0	0	0.00010193	0	0	4.45605e-06	6.37836e-06	5.19971e-06	0	0	0	0	6.78976e-06	0	0	1.1705e-05
Shewanella	1.35618e-05	1.82971e-06	0	0	8.036e-06	5.33783e-06	0.000186824	9.32832e-05	6.35965e-05	0	1.07964e-05	2.12168e-05	0	0	0	0	8.9121e-06	6.37836e-06	0	3.70861e-05	3.15596e-06	2.11105e-06	1.25806e-05	2.26325e-06	8.59904e-06	1.43649e-05	7.80332e-06
Methylophaga	3.32217e-06	2.74457e-05	2.1008e-05	0	2.6117e-05	5.87161e-05	5.0952e-06	7.46266e-06	3.0284e-05	6.45428e-06	2.51916e-05	0	2.2183e-05	4.24708e-06	7.7025e-06	1.77869e-05	8.9121e-06	1.91351e-05	2.07988e-05	5.29801e-05	1.57798e-05	1.89994e-05	6.2903e-06	2.48958e-05	5.15943e-05	7.18246e-06	7.80332e-06
Oleispira	6.21974e-06	7.50182e-05	0	0	0	0	5.0952e-05	1.49253e-05	0	0	0	2.42478e-05	0	0	0.000134794	0	0	0	0	9.00662e-05	3.15596e-06	0	0	0	8.59904e-05	0	0
Labrenzia	7.68345e-06	3.65942e-06	1.40053e-05	0	0.000142639	4.80405e-05	8.49199e-06	1.49253e-05	1.21136e-05	0	9.71677e-05	6.06195e-06	7.39432e-06	0	0	0	0	1.59459e-05	2.59985e-06	1.0596e-05	0	6.33314e-06	0	0	0	7.18246e-06	0
Desulfovibrio	1.0342e-05	5.48914e-06	0.000154058	0	1.4063e-05	0	8.49199e-06	1.1194e-05	1.5142e-05	6.45428e-06	3.59881e-06	3.03097e-05	7.39432e-06	0	1.15537e-05	0	0	6.37836e-06	2.59985e-06	1.0596e-05	3.15596e-06	0	0	6.78976e-06	1.71981e-05	7.18246e-06	3.90166e-06
Leisingera	9.69063e-05	7.31885e-06	0	0	4.018e-06	0	1.86824e-05	5.59699e-05	4.23976e-05	0	0	3.03097e-06	0	0	7.7025e-06	0	0	0	0	6.35762e-05	0	4.22209e-06	0	0	8.59904e-06	7.18246e-06	0
Catenovulum	0.000117959	0	0	0	0	0	1.01904e-05	7.08953e-05	0	6.45428e-06	1.43952e-05	1.81858e-05	0	2.54825e-05	0	0	0	3.18918e-06	1.55991e-05	5.29801e-06	3.15596e-06	0	0	2.26325e-06	0	0	0
Thiobacillus	0	0	3.50133e-05	0	0	0	0	0	3.0284e-06	6.45428e-06	0	0	6.65489e-05	4.24708e-06	3.85125e-06	0	0	3.18918e-06	2.59985e-06	6.88742e-05	3.15596e-05	0	0	2.26325e-06	0	0	0
Microbulbifer	8.36624e-06	1.82971e-06	7.00265e-05	0	0	1.06757e-05	1.52856e-05	1.1194e-05	6.35965e-05	0	7.19761e-06	3.03097e-06	0	0	0	0	0	3.18918e-06	2.59985e-06	5.29801e-06	0	6.33314e-06	0	0	8.59904e-06	7.18246e-06	0
Massilia	2.30504e-05	9.14856e-06	0	0	2.009e-06	0	0	5.22386e-05	0	3.87257e-05	7.19761e-06	0	2.2183e-05	4.24708e-06	1.15537e-05	0	0	0	0	1.0596e-05	1.26238e-05	0	0	0	8.59904e-06	0	7.80332e-06
Colwellia	2.4879e-06	1.82971e-06	2.80106e-05	0	0	0	3.22696e-05	2.98506e-05	0	0	0	3.03097e-05	0	0	3.85125e-06	0	0	0	0	2.64901e-05	0	2.11105e-06	0	0	3.43962e-05	0	0
Thalassospira	6.04904e-06	1.82971e-06	0	0	1.8081e-05	2.66892e-05	0	1.49253e-05	3.0284e-06	0	1.07964e-05	9.09292e-06	1.47886e-05	0	0	5.92898e-06	1.33681e-05	0	2.59985e-06	2.11921e-05	2.84036e-05	4.22209e-06	0	0	0	0	0
Castellaniella	2.43669e-05	0	0	0	0	0	0	0	0	0	0.000104365	0	0	0	0	0	0	0	0	0	0	0	0	6.78976e-06	0	0	0
Bacillus	4.97579e-06	0	0	0	0	2.66892e-05	2.88728e-05	1.1194e-05	0	0	0	0	4.43659e-05	0	0	0	0	0	0	5.29801e-06	6.31192e-06	0	0	0	0	0	0
Simiduia	0.000104763	0	0	0	2.009e-06	0	0	0	0	0	7.19761e-06	0	0	1.27412e-05	0	0	0	0	0	0	0	0	0	0	0	0	0
Chromohalobacter	4.49785e-06	0	0	0	2.2099e-05	1.06757e-05	0	0	0	0	0	0	0	1.27412e-05	0	0	0	0	0	0	0	0	0	4.5265e-06	0	0	7.80332e-06
Hahella	1.8879e-05	0	7.00265e-06	0	6.027e-06	5.33783e-06	0	0	3.0284e-06	0	0	0	0	0	0	5.92898e-06	0	0	0	5.29801e-06	3.15596e-06	2.11105e-06	0	0	0	0	0
Hydrogenophaga	4.293e-06	0	0	0	6.027e-06	0	0	0	9.08521e-06	6.45428e-06	1.07964e-05	0	0	0	0	0	0	0	2.59985e-06	0	0	0	0	2.26325e-06	0	0	7.80332e-06
Cupriavidus	0	0	0	0	0	0	0	0	3.0284e-06	0	0	0	0	0	0	0	4.45605e-06	0	0	0	6.31192e-06	2.11105e-06	6.2903e-06	2.26325e-06	0	7.18246e-06	3.90166e-06
Aquabacterium	2.3172e-06	0	0	0	0	0	0	0	1.21136e-05	0	0	0	0	0	0	5.92898e-06	0	0	0	0	0	8.44418e-06	0	0	0	0	0
Psychromonas	0	0	0	0	0	0	1.18888e-05	0	0	0	0	0	0	0	0	0	0	0	0	1.5894e-05	0	0	0	0	0	0	0
Granulosicoccus	0	0	7.00265e-06	0	0	0	1.6984e-06	0	0	0	0	3.03097e-06	7.39432e-06	0	0	0	0	0	0	0	0	0	0	0	8.59904e-06	0	0
Paenibacillus	0	0	0	0	0	1.60135e-05	0	0	3.0284e-06	0	0	0	0	0	0	0	0	0	0	0	3.15596e-06	0	0	0	0	0	3.90166e-06
Paracoccus	0	0	0	0	2.009e-06	0	0	7.46266e-06	0	0	0	0	0	8.49416e-06	0	0	0	0	0	5.29801e-06	0	2.11105e-06	0	0	0	0	0
Phenylobacterium	0	0	0	0	0	0	0	0	6.05681e-06	0	3.59881e-06	0	7.39432e-06	0	0	0	0	0	0	5.29801e-06	0	2.11105e-06	0	0	0	0	0
Oleiphilus	6.9516e-06	1.82971e-06	0	0	0	0	1.6984e-06	3.73133e-06	0	0	0	3.03097e-06	0	0	0	0	0	0	0	0	6.31192e-06	0	0	0	0	0	0
Dechloromonas	1.24395e-06	0	0	0	0	0	0	0	0	0	0	0	1.47886e-05	0	0	0	0	0	0	5.29801e-06	0	2.11105e-06	0	0	0	0	0
Bradyrhizobium	0	0	0	0	0	5.33783e-06	0	0	0	0	0	0	7.39432e-06	4.24708e-06	0	0	4.45605e-06	0	0	0	0	0	0	0	0	0	0
Pantoea	0	0	0	0	0	2.13513e-05	0	0	0	0	0	0	0	0	0	0	0	0	0	0	0	0	0	0	0	0	0
Achromobacter	0	0	0	0	8.036e-06	0	0	3.73133e-06	0	0	0	0	0	4.24708e-06	0	0	0	0	2.59985e-06	0	0	0	0	2.26325e-06	0	0	0
Acidovorax	0	0	0	0	0	0	0	0	0	0	0	0	0	0	0	0	4.45605e-06	0	0	0	0	0	0	0	0	0	1.56066e-05
Dinoroseobacter	0	0	1.40053e-05	0	2.009e-06	0	0	0	0	0	0	3.03097e-06	0	0	0	0	0	0	0	0	0	0	0	0	0	0	0
Aeromonas	0	0	0	0	0	5.33783e-06	0	0	0	0	0	0	0	0	0	1.1858e-05	0	0	0	0	0	0	0	0	0	0	0
Staphylococcus	0	0	0	0	2.009e-06	0	3.3968e-06	0	0	0	0	0	0	0	0	0	0	0	0	1.0596e-05	0	0	0	0	0	0	0
Rhizobium	3.73184e-06	0	0	0	0	0	0	0	0	0	0	0	0	0	0	0	0	0	0	0	6.31192e-06	0	0	2.26325e-06	0	0	0
Roseobacter	0	0	7.00265e-06	0	0	0	0	0	0	0	0	0	0	0	0	0	0	0	0	5.29801e-06	0	0	0	0	0	0	0
Psychrobacter	1.24395e-06	0	0	0	0	0	0	0	0	0	0	0	0	0	0	0	0	0	0	1.0596e-05	0	0	0	0	0	0	0
Klebsiella	0	0	0	0	0	0	0	0	0	0	0	0	0	0	0	0	0	0	0	0	3.15596e-06	0	0	0	8.59904e-06	0	0
Azospirillum	0	1.82971e-06	0	0	0	0	0	0	6.05681e-06	0	3.59881e-06	0	0	0	0	0	0	0	0	0	0	0	0	0	0	0	0
Sulfurospirillum	3.21975e-06	0	0	0	0	0	3.3968e-06	3.73133e-06	0	0	0	0	0	0	0	0	0	0	0	0	0	0	0	0	0	0	0
Gynuella	0	0	0	0	1.0045e-05	0	0	0	0	0	0	0	0	0	0	0	0	0	0	0	0	0	0	0	0	0	0
Ensifer	0	0	7.00265e-06	0	0	0	0	0	3.0284e-06	0	0	0	0	0	0	0	0	0	0	0	0	0	0	0	0	0	0
Devosia	0	0	0	0	0	0	0	0	0	0	0	0	0	4.24708e-06	0	0	0	3.18918e-06	0	0	0	0	0	2.26325e-06	0	0	0
Corynebacterium	0	0	0	0	2.009e-06	0	0	3.73133e-06	3.0284e-06	0	0	0	0	0	0	0	0	0	0	0	0	0	0	0	0	0	0
Wenyingzhuangia	0	0	0	0	0	0	1.6984e-06	0	3.0284e-06	0	0	3.03097e-06	0	0	0	0	0	0	0	0	0	0	0	0	0	0	0
Pseudoxanthomonas	0	0	0	0	0	0	0	0	0	0	3.59881e-06	0	0	0	0	0	0	0	0	0	0	0	0	0	0	0	3.90166e-06
Anoxybacillus	2.1465e-06	0	0	0	0	0	0	0	0	0	0	0	0	0	0	0	0	0	0	5.29801e-06	0	0	0	0	0	0	0
Methylomonas	0	0	0	0	0	0	0	0	0	0	0	0	7.39432e-06	0	0	0	0	0	0	0	0	0	0	0	0	0	0
Martelella	0	0	0	0	0	0	0	0	3.0284e-06	0	0	0	0	4.24708e-06	0	0	0	0	0	0	0	0	0	0	0	0	0
Moritella	0	0	0	0	0	0	3.3968e-06	0	0	0	0	0	0	0	0	0	0	0	0	0	3.15596e-06	0	0	0	0	0	0
Hyphomicrobium	3.73184e-06	0	0	0	0	0	0	0	0	0	0	0	0	0	0	0	0	0	0	0	0	0	0	2.26325e-06	0	0	0
Rhodococcus	0	0	0	0	0	0	0	0	0	0	0	0	0	0	0	0	0	0	0	5.29801e-06	0	0	0	0	0	0	0
Azospira	0	0	0	0	0	0	0	0	0	0	0	0	0	0	0	0	0	0	0	5.29801e-06	0	0	0	0	0	0	0
Thauera	1.24395e-06	0	0	0	0	0	0	3.73133e-06	0	0	0	0	0	0	0	0	0	0	0	0	0	0	0	0	0	0	0
Pseudonocardia	0	0	0	0	0	0	0	0	0	0	0	0	0	4.24708e-06	0	0	0	0	0	0	0	0	0	0	0	0	0
Caulobacter	0	0	0	0	2.009e-06	0	0	0	0	0	0	0	0	0	0	0	0	0	0	0	0	2.11105e-06	0	0	0	0	0
Delftia	1.07325e-06	0	0	0	0	0	0	0	3.0284e-06	0	0	0	0	0	0	0	0	0	0	0	0	0	0	0	0	0	0
Comamonas	0	0	0	0	0	0	0	0	0	0	0	0	0	0	0	0	0	0	0	0	0	0	0	0	0	0	3.90166e-06
Burkholderia	0	0	0	0	0	0	0	0	0	0	3.59881e-06	0	0	0	0	0	0	0	0	0	0	0	0	0	0	0	0
Actinomyces	0	0	0	0	0	0	0	0	0	0	3.59881e-06	0	0	0	0	0	0	0	0	0	0	0	0	0	0	0	0
Thiomonas	0	0	0	0	0	0	0	0	0	0	0	0	0	0	0	0	0	3.18918e-06	0	0	0	0	0	0	0	0	0
Tamlana	0	0	0	0	0	0	0	0	0	0	0	3.03097e-06	0	0	0	0	0	0	0	0	0	0	0	0	0	0	0
Methyloversatilis	0	0	0	0	2.009e-06	0	0	0	0	0	0	0	0	0	0	0	0	0	0	0	0	0	0	0	0	0	0
Serratia	0	0	0	0	2.009e-06	0	0	0	0	0	0	0	0	0	0	0	0	0	0	0	0	0	0	0	0	0	0
Saccharophagus	0	0	0	0	0	0	1.6984e-06	0	0	0	0	0	0	0	0	0	0	0	0	0	0	0	0	0	0	0	0
Azoarcus	1.07325e-06	0	0	0	0	0	0	0	0	0	0	0	0	0	0	0	0	0	0	0	0	0	0	0	0	0	0
Nonomuraea	1.07325e-06	0	0	0	0	0	0	0	0	0	0	0	0	0	0	0	0	0	0	0	0	0	0	0	0	0	0

## Sheet: Sheet 8
	IN	PCa1	PCa2	PCa3	PCa4	PCa5	PMa1	PMa2	PMa3	PMa4	PMa5	PGa1	PGa2	PGa3	PCb1	PCb2	PCb3	PCb4	PCb5	PMb1	PMb2	PMb3	PMb4	PMb5	PGb1	PGb2	PGb3
Arcobacter	0.0131968	0.000488972	0.0118626	0.00860551	0.000127351	0.00208615	0.000555416	0.00266474	0.000985109	0.000444612	0.0322496	0.00320057	0.00645202	0.00234465	0.000607262	0.00297955	0.000350896	0.00105832	0.00247556	0.00994169	4.10295e-05	7.71879e-05	0.00281525	0.00138289	0.0029253	0.000952106	0.000256655
Halomonas	0.00244439	0.000819358	0.00202669	0.000729106	0.00386603	0.00234557	0.00176505	0.00260199	0.000353402	0.000772778	0.00121545	0.00554297	0.000728849	0.0034566	0.000371383	0.00350677	0.00052836	0.00295346	0.00181978	0.00106134	0.000681721	0.000962276	0.000335998	0.00270182	0.00197398	0.0010875	0.00433959
Marinobacter	8.1605e-05	0.000277524	0.00295461	0.000189978	0.000718626	0.000178349	0.000435254	0.000811552	0.000344567	0.00042344	1.74885e-05	0.00571883	3.91328e-05	0.000221384	2.00748e-05	0.00921648	0.000177464	4.30714e-05	0.000404396	0.00025526	0.000261958	0.000766733	6.61813e-05	2.13222e-05	0.00229505	0.000441114	0.00113023
Vibrio	0.00607995	0.000647557	0.000329927	0.000189978	9.09653e-06	0.000508026	0.000168227	8.36652e-06	1.76701e-05	3.88154e-05	0.000629585	0.000984792	0.000381545	0.000211321	0.000205766	3.06268e-05	3.62995e-05	3.07653e-05	0.000131155	0.000282129	6.94346e-05	2.05834e-05	0.00011709	0.000115749	0.000582681	4.36746e-05	3.06103e-05
Desulfovibrio	0.000250484	0.000845789	0.000232716	0.000492917	5.00309e-05	4.32362e-05	5.34054e-05	4.18326e-05	3.97577e-05	0.000179962	1.74885e-05	0.00068232	0.000650583	0.000367296	7.02617e-05	0.000122507	0.000153265	0.000842968	0.000169409	0.00022839	4.41856e-05	0.000113209	0.00369088	0.000188853	0.000332961	0.000458583	2.11917e-05
Coraliomargarita	0.00039166	0.00029074	0.000114885	0.000215651	4.54827e-06	9.72815e-05	0.000667567	2.09163e-05	2.20876e-05	9.88027e-05	0.000393491	0.00165304	0.000127182	0.000171069	0.000255953	0.000142196	1.61331e-05	0	0.000251381	0.000295564	9.46835e-05	0.000164668	0.000167999	7.91966e-05	0.000677813	2.62048e-05	0.000306103
Mycobacterium	0.000204731	0	2.06204e-05	4.6211e-05	0.000113707	0.000254013	1.33513e-05	2.50996e-05	1.32526e-05	0.000144675	0.000201118	0	0.000136965	0.000266667	5.01869e-06	2.84392e-05	0.000350896	0.000713754	0.000573805	0	0	5.14586e-06	0.000310543	0.00120927	0	0.000742468	0.000692263
Photobacterium	0.00140803	0.00144048	2.94578e-06	4.10764e-05	4.54827e-06	5.40453e-06	0.000608822	8.36652e-05	4.41753e-05	0	8.74424e-06	7.03423e-06	2.93496e-05	7.04403e-05	0.00027101	2.40639e-05	0	0	2.7324e-05	0.000537389	0.000142025	0.00014923	4.58178e-05	4.26443e-05	0.000309178	7.42468e-05	0
Methylophaga	6.02685e-05	7.92927e-05	0.000326981	0.000359419	0.000527599	0.000135113	9.88e-05	5.85656e-05	3.53402e-05	0.000172905	9.61866e-05	0.000745628	0.00012229	0.000211321	0	0.00016626	6.04992e-05	4.92244e-05	0.00014755	8.06083e-05	0.000126245	0.000277876	3.05452e-05	5.48284e-05	0.000214046	3.93071e-05	0.000310812
Tenacibaculum	0.000484081	5.28618e-05	3.82951e-05	0.000261862	0.000259251	0.00016754	2.67027e-05	4.18326e-06	0	0.000116446	0.000559631	0.000372814	7.3374e-05	0.000316981	2.50935e-05	1.09381e-05	3.62995e-05	3.07653e-05	0.000803327	0.000188086	1.57806e-05	1.02917e-05	0.000259634	0.000265004	2.37829e-05	6.11444e-05	6.59298e-05
Alcanivorax	3.1302e-05	0.000488972	1.17831e-05	0.000118095	4.54827e-06	2.70226e-05	0.000181578	8.36652e-06	0	0.000134089	8.74424e-06	0.000752662	9.7832e-06	8.55346e-05	1.50561e-05	3.93773e-05	0	1.84592e-05	9.29018e-05	0.000161217	0.000135713	3.6021e-05	1.01817e-05	0.000106611	0.000963208	3.05722e-05	0.000143633
Thiobacillus	0	0	0.000108994	2.56728e-05	4.54827e-06	0.000172945	7.20973e-05	4.18326e-05	2.65052e-05	3.52867e-06	0.000131164	4.92396e-05	4.8916e-06	2.01258e-05	0	0.000455027	0	9.22958e-05	8.74369e-05	8.06083e-05	3.15612e-05	6.68962e-05	0	6.09204e-06	1.18915e-05	4.36746e-06	0.00179659
Alteromonas	0.000434629	6.60773e-05	0.000162018	1.54037e-05	0	1.62136e-05	4.80649e-05	1.25498e-05	0	3.52867e-06	2.62327e-05	0.000323575	0	4.02516e-05	6.5243e-05	4.81278e-05	4.03328e-05	0	8.74369e-05	8.06083e-05	3.15612e-06	0	0	0.00109657	2.37829e-05	4.36746e-06	4.47381e-05
Microbulbifer	6.33666e-05	2.64309e-05	5.3024e-05	0.000210517	4.54827e-05	2.70226e-05	0.000149535	0.000292828	0.000163448	3.52867e-05	4.37212e-05	0.00013365	0.000225014	0.000161006	4.51683e-05	7.87546e-05	0.000104865	6.76836e-05	6.01129e-05	0	2.20928e-05	0.000123501	3.05452e-05	9.74727e-05	8.32402e-05	0.000148494	3.29649e-05
Hyphomonas	0.000264105	1.32155e-05	3.53493e-05	0	9.09653e-06	0.000518835	4.53946e-05	4.18326e-06	8.83505e-06	7.05734e-06	8.74424e-06	0.000309506	0	3.01887e-05	1.00374e-05	0.000225326	8.06657e-06	0	5.46481e-06	0.000161217	4.10295e-05	3.6021e-05	5.09087e-06	9.13807e-06	0.000309178	8.73492e-06	1.41278e-05
Reinekea	3.73859e-05	0.000251094	8.83733e-06	4.10764e-05	9.09653e-06	0.000340485	9.61297e-05	2.92828e-05	3.53402e-05	3.1758e-05	0	4.22054e-05	2.4458e-05	0.000206289	7.52804e-05	2.40639e-05	2.01664e-05	0	6.55777e-05	0.000214956	2.20928e-05	2.05834e-05	1.01817e-05	4.56903e-05	3.56744e-05	8.73492e-06	4.00288e-05
Shewanella	9.97208e-05	2.64309e-05	0	2.56728e-05	0	2.70226e-05	2.67027e-05	0	3.97577e-05	7.05734e-06	8.74424e-06	0.000218061	1.95664e-05	2.51572e-05	2.00748e-05	0	0	0	5.46481e-06	5.37389e-05	9.46835e-06	0	2.03635e-05	0.000234544	0	1.31024e-05	7.06391e-06
Pseudomonas	1.63575e-05	0	0.000114885	5.13455e-06	9.09653e-06	9.1877e-05	1.06811e-05	0	0	7.05734e-06	0	7.03423e-06	6.84824e-05	7.04403e-05	1.50561e-05	3.93773e-05	0	6.15305e-06	3.27889e-05	0	9.46835e-06	1.02917e-05	0	2.43682e-05	2.37829e-05	3.05722e-05	3.53195e-05
Labrenzia	8.532e-06	2.64309e-05	1.17831e-05	1.02691e-05	9.09653e-06	1.08091e-05	1.60216e-05	1.25498e-05	0	3.52867e-06	3.4977e-05	2.11027e-05	1.95664e-05	6.03774e-05	0	4.37526e-06	1.20998e-05	1.84592e-05	2.18592e-05	4.03042e-05	1.26245e-05	1.02917e-05	0	5.17824e-05	2.37829e-05	8.73492e-06	7.06391e-06
Thalassospira	3.29311e-05	1.32155e-05	8.83733e-06	2.56728e-05	0	1.08091e-05	0	4.18326e-06	0	1.76433e-05	3.4977e-05	7.03423e-06	2.93496e-05	7.04403e-05	0	8.31299e-05	0	1.23061e-05	0	4.03042e-05	0	2.57293e-05	0	1.21841e-05	0	4.36746e-06	0
Colwellia	3.7196e-05	5.28618e-05	0	0	0	0	2.40324e-05	0	0	0	0	0.000105513	0	0	8.53178e-05	0	0	0	0	0.000120912	0	0	0	0	0	0	0
Moritella	9.78843e-07	0.000158585	5.89155e-06	0	0	0	8.01081e-06	0	0	0	0	0	0	0	0	0	0	0	5.46481e-06	0.000120912	0	0	0	3.04602e-06	9.51316e-05	0	0
Catenovulum	5.86782e-06	0	5.89155e-06	0	0	0.000199968	1.33513e-05	0	0	3.52867e-06	0	0	0	9.55975e-05	0	2.18763e-06	0	0	2.18592e-05	0	0	5.14586e-06	0	1.52301e-05	0	0	4.70927e-06
Hahella	9.71117e-06	0	1.47289e-05	5.13455e-06	0	1.08091e-05	0	8.36652e-06	0	0	0	0	4.8916e-06	6.03774e-05	0	8.75051e-06	1.20998e-05	0	0	0	0	5.14586e-06	1.01817e-05	0.000164485	0	0	0
Psychromonas	7.13168e-05	1.32155e-05	4.71324e-05	0	0	5.40453e-06	8.01081e-06	0	4.41753e-06	0	0	2.81369e-05	0	0	2.50935e-05	4.37526e-06	0	0	1.09296e-05	0	0	0	5.09087e-06	0	8.32402e-05	0	2.35464e-06
Massilia	4.89422e-06	3.96464e-05	2.94578e-06	5.13455e-06	2.27413e-05	3.24272e-05	0	4.18326e-06	4.41753e-06	0	8.74424e-06	1.40685e-05	4.8916e-05	5.03145e-06	0	4.37526e-06	0	6.15305e-06	0	4.03042e-05	1.26245e-05	5.14586e-06	0	0	0	8.73492e-06	0
Paracoccus	9.78843e-07	0	9.72106e-05	0	0	1.62136e-05	2.67027e-06	0	0	0	0	1.40685e-05	0	1.50943e-05	0	2.84392e-05	0	0	0	0	0	1.02917e-05	0	3.04602e-06	0	4.36746e-06	2.82556e-05
Roseobacter	3.91537e-06	5.28618e-05	0	0	0	0	8.01081e-06	0	0	0	0	7.03423e-06	0	0	2.00748e-05	2.18763e-06	0	0	0	6.71736e-05	9.46835e-06	0	0	0	2.37829e-05	0	0
Bacillus	6.64109e-06	0	5.89155e-05	2.05382e-05	1.36448e-05	1.08091e-05	2.67027e-06	0	0	3.52867e-06	0	0	0	1.00629e-05	5.01869e-06	2.84392e-05	0	0	5.46481e-06	0	0	1.02917e-05	0	0	0	1.31024e-05	2.35464e-06
Sulfurospirillum	1.069e-05	0	2.94578e-06	5.13455e-06	0	0	5.34054e-06	0	0	3.52867e-06	8.74424e-06	7.73765e-05	1.46748e-05	2.01258e-05	1.50561e-05	0	4.03328e-06	0	0	1.34347e-05	0	0	0	9.13807e-06	0	0	0
Wenyingzhuangia	2.28701e-05	0	0	1.54037e-05	0	0	1.60216e-05	4.18326e-06	4.41753e-06	0	0	0	3.91328e-05	0	1.00374e-05	0	0	0	0	0	0	0	5.59996e-05	0	0	0	0
Dinoroseobacter	0	1.32155e-05	0	0	0	0	2.13622e-05	0	0	0	0	0	0	0	0	0	0	0	0	8.06083e-05	0	0	0	0	4.75658e-05	0	0
Devosia	0	0	4.71324e-05	5.13455e-06	1.81931e-05	1.08091e-05	0	0	0	0	0	2.11027e-05	0	1.50943e-05	0	2.62515e-05	4.03328e-06	6.15305e-06	0	0	0	0	5.09087e-06	0	0	0	2.35464e-06
Staphylococcus	4.8222e-06	0	0	1.54037e-05	4.54827e-06	0	0	4.18326e-06	0	0	0	7.03423e-06	0	1.00629e-05	0	0	1.20998e-05	0	0	0	0	5.14586e-06	8.1454e-05	0	0	1.31024e-05	0
Hydrogenophaga	2.79773e-06	0	2.94578e-06	0	0	2.70226e-05	0	0	0	0	1.74885e-05	1.40685e-05	0	1.00629e-05	0	8.75051e-06	0	6.15305e-06	5.46481e-06	1.34347e-05	0	0	0	2.13222e-05	0	4.36746e-06	7.06391e-06
Lysobacter	0	0	3.24035e-05	0	0	0	2.67027e-06	0	0	0	0	1.40685e-05	0	2.01258e-05	0	2.40639e-05	0	0	0	1.34347e-05	0	5.14586e-06	0	3.04602e-06	1.18915e-05	4.36746e-06	2.35464e-06
Azoarcus	0	0	5.89155e-06	5.13455e-06	0	4.32362e-05	0	0	0	0	0	0	0	5.03145e-06	0	1.09381e-05	0	6.15305e-06	1.09296e-05	0	0	0	5.09087e-06	3.04602e-06	0	4.36746e-06	2.5901e-05
Microvirga	9.78843e-07	0	4.71324e-05	0	0	0	0	0	0	3.52867e-06	0	0	0	2.51572e-05	0	4.15649e-05	4.03328e-06	0	0	0	0	0	0	0	0	0	0
Gynuella	0	0	0	0	0	0	0	0	0	0	8.74424e-05	0	0	0	0	0	0	0	0	0	0	0	0	0	0	4.36746e-06	0
Leisingera	2.36926e-05	0	2.94578e-06	5.13455e-06	0	0	5.34054e-06	0	4.41753e-06	0	0	7.03423e-06	0	0	5.01869e-06	4.37526e-06	0	0	0	1.34347e-05	0	0	5.09087e-06	0	1.18915e-05	0	0
Phenylobacterium	1.04562e-06	0	5.89155e-06	5.13455e-06	0	0	0	0	0	0	0	7.03423e-06	0	2.01258e-05	0	8.75051e-06	0	0	5.46481e-06	0	0	0	0	0	0	0	2.35464e-06
Geobacter	0	0	0	5.13455e-06	0	0	0	0	0	0	8.74424e-06	0	0	0	0	0	0	0	0	4.03042e-05	0	0	0	0	0	0	0
Paenibacillus	5.2281e-06	0	0	1.54037e-05	0	0	0	0	0	0	8.74424e-06	0	4.8916e-06	5.03145e-06	5.01869e-06	0	0	0	0	0	0	0	0	0	0	8.73492e-06	0
Aquabacterium	3.84336e-06	0	0	0	4.54827e-06	0	0	0	0	0	1.74885e-05	0	0	5.03145e-06	0	0	4.03328e-06	0	0	1.34347e-05	0	0	0	0	0	0	2.35464e-06
Granulosicoccus	1.95769e-06	0	0	0	0	0	0	8.36652e-06	0	0	0	0	0	5.03145e-06	5.01869e-06	0	0	0	0	2.68694e-05	0	0	0	0	0	0	2.35464e-06
Magnetospirillum	0	0	0	0	0	3.78317e-05	0	0	0	0	0	0	0	5.03145e-06	0	0	0	0	0	0	0	0	0	0	0	0	2.35464e-06
Achromobacter	2.79773e-06	0	0	0	0	5.40453e-06	2.67027e-06	4.18326e-06	0	0	0	0	0	5.03145e-06	0	0	4.03328e-06	6.15305e-06	5.46481e-06	0	0	0	0	3.04602e-06	0	0	4.70927e-06
Psychrobacter	3.32807e-05	0	2.94578e-06	0	0	0	0	0	0	0	0	7.03423e-06	0	0	0	0	0	0	0	0	0	0	0	0	0	0	0
Tamlana	9.78843e-07	0	2.94578e-06	0	0	0	0	0	0	0	0	1.40685e-05	0	5.03145e-06	0	0	0	0	0	0	0	5.14586e-06	0	0	1.18915e-05	0	0
Martelella	0	0	2.94578e-06	0	0	0	0	0	0	0	8.74424e-06	0	0	1.00629e-05	0	2.18763e-06	0	0	0	0	0	0	0	6.09204e-06	0	4.36746e-06	2.35464e-06
Nocardioides	1.04562e-06	0	0	0	0	0	0	0	0	0	0	0	0	1.50943e-05	0	2.18763e-06	0	6.15305e-06	0	0	0	0	0	3.04602e-06	0	4.36746e-06	4.70927e-06
Cellvibrio	0	0	8.83733e-06	0	0	0	0	0	0	0	0	0	0	1.50943e-05	0	0	0	0	5.46481e-06	0	0	0	0	3.04602e-06	0	0	2.35464e-06
Oleispira	1.37038e-05	0	0	0	0	0	0	0	0	0	0	0	0	0	0	6.56289e-06	0	0	0	1.34347e-05	0	0	0	0	0	0	0
Corynebacterium	2.09124e-06	0	0	1.02691e-05	0	5.40453e-06	0	4.18326e-06	0	3.52867e-06	0	0	0	0	0	0	0	0	0	0	0	0	0	3.04602e-06	0	4.36746e-06	0
Janthinobacterium	0	0	8.83733e-06	0	0	0	0	0	0	0	0	0	0	0	0	1.96887e-05	0	0	0	0	0	0	0	0	0	0	0
Dechloromonas	0	0	0	5.13455e-06	0	0	0	0	0	0	0	0	0	0	0	0	0	1.84592e-05	0	0	0	0	0	0	0	0	0
Oleiphilus	9.78843e-07	0	0	0	0	0	0	0	0	0	0	0	0	0	0	0	0	0	0	1.34347e-05	3.15612e-06	5.14586e-06	0	0	0	0	0
Anaeromyxobacter	0	0	0	0	4.54827e-06	0	5.34054e-06	0	0	3.52867e-06	0	0	0	0	0	0	0	0	0	0	0	0	0	0	0	4.36746e-06	0
Azospirillum	0	0	5.89155e-06	0	0	0	0	0	0	0	0	0	0	5.03145e-06	0	2.18763e-06	0	0	0	0	0	0	0	3.04602e-06	0	0	0
Rhodococcus	1.04562e-06	0	0	0	0	0	0	0	0	0	0	0	4.8916e-06	5.03145e-06	0	0	0	0	0	0	0	0	5.09087e-06	0	0	0	0
Rhodoferax	0	0	0	0	0	0	0	0	0	0	0	0	0	0	0	0	0	0	0	1.34347e-05	0	0	0	0	0	0	2.35464e-06
Chelatococcus	0	0	0	0	0	0	0	0	0	0	0	0	0	0	0	1.53134e-05	0	0	0	0	0	0	0	0	0	0	0
Methyloversatilis	5.59547e-06	0	0	0	0	0	0	0	0	0	0	0	0	5.03145e-06	0	2.18763e-06	0	0	0	0	0	0	0	0	0	0	2.35464e-06
Klebsiella	0	0	2.94578e-06	0	0	0	0	0	0	0	0	0	0	0	0	2.18763e-06	0	0	5.46481e-06	0	0	0	0	3.04602e-06	0	0	0
Aquaspirillum	0	1.32155e-05	0	0	0	0	0	0	0	0	0	0	0	0	0	0	0	0	0	0	0	0	0	0	0	0	0
Aeromonas	6.8519e-06	0	0	5.13455e-06	0	0	0	0	0	0	0	0	0	0	0	0	0	0	0	0	0	0	0	0	0	0	0
Delftia	0	0	0	0	0	0	2.67027e-06	0	0	0	0	0	0	0	0	0	0	6.15305e-06	0	0	0	0	0	0	0	0	2.35464e-06
Zobellella	0	0	0	0	0	5.40453e-06	0	0	0	0	0	0	0	0	0	0	0	0	5.46481e-06	0	0	0	0	0	0	0	0
Gordonia	9.78843e-07	0	0	0	0	0	0	4.18326e-06	0	0	0	0	4.8916e-06	0	0	0	0	0	0	0	0	0	0	0	0	0	0
Cupriavidus	0	0	0	0	0	0	5.34054e-06	0	0	0	0	0	0	0	0	0	0	0	0	0	0	0	0	0	0	0	4.70927e-06
Pantoea	0	0	0	0	0	5.40453e-06	0	0	4.41753e-06	0	0	0	0	0	0	0	0	0	0	0	0	0	0	0	0	0	0
Comamonas	9.78843e-07	0	0	0	0	0	0	0	0	0	0	0	0	0	0	0	0	0	0	0	3.15612e-06	0	0	0	0	4.36746e-06	0
Arenibacter	1.95769e-06	0	0	0	0	0	2.67027e-06	0	0	0	0	0	0	0	0	0	0	0	0	0	3.15612e-06	0	0	0	0	0	0
Rothia	0	0	0	0	0	0	2.67027e-06	0	0	0	0	0	0	0	0	0	0	0	0	0	0	0	5.09087e-06	0	0	0	0
Shinella	0	0	0	0	0	0	2.67027e-06	0	0	0	0	0	0	5.03145e-06	0	0	0	0	0	0	0	0	0	0	0	0	0
Bradyrhizobium	0	0	0	0	0	0	0	0	4.41753e-06	0	0	0	0	0	0	0	0	0	0	0	3.15612e-06	0	0	0	0	0	0
Simiduia	0	0	0	0	0	0	0	0	4.41753e-06	0	0	0	0	0	0	0	0	0	0	0	0	0	0	3.04602e-06	0	0	0
Thermus	0	0	0	0	0	0	0	0	0	0	0	0	0	5.03145e-06	0	0	0	0	0	0	0	0	0	0	0	0	2.35464e-06
Kocuria	0	0	0	0	0	0	0	0	0	0	0	0	0	0	0	2.18763e-06	0	0	0	0	0	0	5.09087e-06	0	0	0	0
Pseudonocardia	0	0	2.94578e-06	0	0	0	0	4.18326e-06	0	0	0	0	0	0	0	0	0	0	0	0	0	0	0	0	0	0	0
Thiomonas	0	0	0	0	0	0	0	0	0	7.05734e-06	0	0	0	0	0	0	0	0	0	0	0	0	0	0	0	0	0
Serratia	0	0	0	0	0	0	0	0	0	0	0	7.03423e-06	0	0	0	0	0	0	0	0	0	0	0	0	0	0	0
Rhizobium	9.78843e-07	0	0	5.13455e-06	0	0	0	0	0	0	0	0	0	0	0	0	0	0	0	0	0	0	0	0	0	0	0
Anoxybacillus	0	0	0	0	0	5.40453e-06	0	0	0	0	0	0	0	0	0	0	0	0	0	0	0	0	0	0	0	0	0
Herbaspirillum	0	0	0	0	0	0	0	0	0	0	0	0	0	0	0	0	0	0	0	0	0	5.14586e-06	0	0	0	0	0
Chromohalobacter	0	0	0	5.13455e-06	0	0	0	0	0	0	0	0	0	0	0	0	0	0	0	0	0	0	0	0	0	0	0
Azospira	0	0	0	5.13455e-06	0	0	0	0	0	0	0	0	0	0	0	0	0	0	0	0	0	0	0	0	0	0	0
Aminobacter	0	0	0	5.13455e-06	0	0	0	0	0	0	0	0	0	0	0	0	0	0	0	0	0	0	0	0	0	0	0
Pseudoxanthomonas	0	0	2.94578e-06	0	0	0	0	0	0	0	0	0	0	0	0	2.18763e-06	0	0	0	0	0	0	0	0	0	0	0
Castellaniella	0	0	0	0	0	0	0	0	0	0	0	0	0	5.03145e-06	0	0	0	0	0	0	0	0	0	0	0	0	0
Meiothermus	0	0	0	0	0	0	0	0	0	0	0	0	4.8916e-06	0	0	0	0	0	0	0	0	0	0	0	0	0	0
Nonomuraea	0	0	0	0	0	0	0	0	0	0	0	0	4.8916e-06	0	0	0	0	0	0	0	0	0	0	0	0	0	0
Rhodoplanes	0	0	0	0	0	0	0	4.18326e-06	0	0	0	0	0	0	0	0	0	0	0	0	0	0	0	0	0	0	0
Acidovorax	9.78843e-07	0	2.94578e-06	0	0	0	0	0	0	0	0	0	0	0	0	0	0	0	0	0	0	0	0	0	0	0	0
Ensifer	1.04562e-06	0	0	0	0	0	2.67027e-06	0	0	0	0	0	0	0	0	0	0	0	0	0	0	0	0	0	0	0	0
Burkholderia	0	0	0	0	0	0	0	0	0	3.52867e-06	0	0	0	0	0	0	0	0	0	0	0	0	0	0	0	0	0
Thioalkalivibrio	0	0	0	0	0	0	0	0	0	0	0	0	0	0	0	0	0	0	0	0	3.15612e-06	0	0	0	0	0	0
Thauera	0	0	2.94578e-06	0	0	0	0	0	0	0	0	0	0	0	0	0	0	0	0	0	0	0	0	0	0	0	0
Caulobacter	0	0	2.94578e-06	0	0	0	0	0	0	0	0	0	0	0	0	0	0	0	0	0	0	0	0	0	0	0	0
Hyphomicrobium	0	0	0	0	0	0	2.67027e-06	0	0	0	0	0	0	0	0	0	0	0	0	0	0	0	0	0	0	0	0
Isoptericola	0	0	0	0	0	0	0	0	0	0	0	0	0	0	0	2.18763e-06	0	0	0	0	0	0	0	0	0	0	0
Alkalilimnicola	0	0	0	0	0	0	0	0	0	0	0	0	0	0	0	2.18763e-06	0	0	0	0	0	0	0	0	0	0	0
Nocardiopsis	0	0	0	0	0	0	0	0	0	0	0	0	0	0	0	2.18763e-06	0	0	0	0	0	0	0	0	0	0	0
Aliivibrio	1.95769e-06	0	0	0	0	0	0	0	0	0	0	0	0	0	0	0	0	0	0	0	0	0	0	0	0	0	0
Morganella	9.78843e-07	0	0	0	0	0	0	0	0	0	0	0	0	0	0	0	0	0	0	0	0	0	0	0	0	0	0

## Sheet: Sheet 9
	IN	PCa1	PCa2	PCa3	PCa4	PCa5	PMa1	PMa2	PMa3	PMa4	PMa5	PGa1	PGa2	PGa3	PCb1	PCb2	PCb3	PCb4	PCb5	PMb1	PMb2	PMb3	PMb4	PMb5	PGb1	PGb2	PGb3
Arcobacter	6.88481e-05	2.19565e-05	0.00192573	7.19904e-05	4.018e-06	7.47296e-05	0.00140457	0.00999996	0.000387636	0.0293992	0.000280707	0.000487987	9.61261e-05	2.12354e-05	1.92562e-05	0.000545466	0	3.18918e-05	7.79956e-06	0.000725828	2.52477e-05	6.33314e-06	1.88709e-05	2.26325e-05	0.000481546	0.000114919	5.46233e-05
Sulfurovum	0.000157561	8.23371e-05	0.0120796	7.19904e-05	1.6072e-05	3.2027e-05	0.00209413	0.00125	0.00536936	7.09971e-05	3.23892e-05	0.00282487	0.000133098	0.000208107	0.000204116	3.55739e-05	3.11923e-05	6.69728e-05	1.03994e-05	0.000164238	4.10275e-05	6.12203e-05	0.000289354	1.8106e-05	0.00258831	0.000280116	3.90166e-05
Rhodopirellula	0.000256383	0.000109783	0.000224085	7.19904e-05	0.00180609	0.000448378	0	2.98506e-05	4.54261e-05	1.93628e-05	0.000215928	0	0.000244012	0.00115521	0.000181009	0.000148225	0.000124769	5.74053e-05	9.35947e-05	2.64901e-05	0.00013255	6.75534e-05	0.00020758	0.000262537	8.59904e-06	0.000215474	0.000335543
Sulfurimonas	5.81988e-05	6.03805e-05	0.000987374	0	2.009e-06	4.27027e-05	0.000966389	0.000593281	0.00102663	6.45428e-06	1.07964e-05	0.0010275	5.91545e-05	5.5212e-05	8.47275e-05	8.30058e-05	5.79286e-05	0.000127567	2.33987e-05	0.000143046	1.57798e-05	2.11105e-06	0.000100645	1.58428e-05	0.000756716	7.90071e-05	1.1705e-05
Coraliomargarita	2.40255e-05	1.82971e-05	9.80372e-05	1.79976e-05	3.0135e-05	0	1.35872e-05	2.2388e-05	3.93692e-05	3.22714e-05	1.07964e-05	0.000136394	0.000207041	8.49416e-06	6.162e-05	1.1858e-05	0.00014705	2.23243e-05	1.29993e-05	9.00662e-05	3.15596e-05	6.33314e-06	9.43545e-05	2.26325e-06	0.00473807	9.3372e-05	0
Opitutus	0.000133375	0	0	0.000233969	0.00264987	0.000154797	1.6984e-06	0	0	3.22714e-05	0.000370677	0	9.61261e-05	0.000722003	3.85125e-06	4.15029e-05	0	0.000108432	0.00070716	1.0596e-05	0	0	0	0.000178797	8.59904e-06	0	0.000214591
Nocardioides	0	0	0	0	1.2054e-05	0	0	0	0	0	0.000680174	0	0	0.00010193	0	0	4.45605e-06	6.37836e-06	5.19971e-06	0	0	0	0	6.78976e-06	0	0	1.1705e-05
Methyloceanibacter	1.92204e-05	0	0.00013305	0	3.4153e-05	5.33783e-05	1.6984e-05	1.1194e-05	7.26817e-05	1.93628e-05	1.07964e-05	6.06195e-06	7.39432e-06	1.27412e-05	0	0	4.45605e-06	3.18918e-06	2.59985e-06	5.29801e-06	0	4.22209e-06	1.25806e-05	2.26325e-06	1.71981e-05	1.43649e-05	0
Filomicrobium	3.59828e-05	0.000106123	0	0	2.009e-06	4.27027e-05	0	0	3.0284e-06	0	0	0	0	4.24708e-06	4.6215e-05	7.11478e-05	0	2.87026e-05	2.59985e-06	0	3.15596e-06	2.11105e-06	6.2903e-06	0	0	0	0
Phycisphaera	2.1465e-06	0	0	0	5.6252e-05	7.47296e-05	0	0	6.05681e-06	0	3.59881e-06	0	0	2.54825e-05	3.85125e-06	0	4.45605e-06	9.56755e-06	0	0	3.15596e-06	0	0	2.26325e-06	0	0	0
Bacillus	4.97579e-06	0	0	0	0	2.66892e-05	2.88728e-05	1.1194e-05	0	0	0	0	4.43659e-05	0	0	0	0	0	0	5.29801e-06	6.31192e-06	0	0	0	0	0	0
Methylobacterium	7.83687e-05	0	7.00265e-06	0	4.018e-06	0	1.6984e-06	0	3.0284e-06	0	0	0	1.47886e-05	0	0	0	0	0	0	5.29801e-06	0	4.22209e-06	0	2.26325e-06	0	0	3.90166e-06
Rubinisphaera	0	0	0	3.59952e-05	3.8171e-05	0	0	0	3.0284e-06	0	7.19761e-06	0	0	8.49416e-06	0	0	0	0	0	0	0	0	0	0	0	0	0
Pirellula	0	0	0	0	0	8.00675e-05	0	0	3.0284e-06	0	0	0	0	0	0	0	0	0	0	0	0	0	0	2.26325e-06	0	0	0
Haloferax	0	3.65942e-06	2.80106e-05	0	0	0	1.6984e-06	0	3.63408e-05	0	0	3.03097e-06	0	0	3.85125e-06	0	0	0	0	0	0	0	0	0	0	0	0
Bosea	0	0	0	0	0	0	0	0	0	0	0	0	5.91545e-05	0	0	0	0	0	0	0	3.15596e-06	0	0	0	0	0	0
Brevibacillus	1.24395e-06	0	0	1.79976e-05	0	4.27027e-05	0	0	0	0	0	0	0	0	0	0	0	0	0	0	0	0	0	0	0	0	0
Salinigranum	0	1.09783e-05	2.80106e-05	0	0	5.33783e-06	0	0	9.08521e-06	0	0	0	0	0	0	0	0	0	0	0	0	0	0	0	0	7.18246e-06	0
Roseomonas	3.36122e-05	1.82971e-06	0	0	0	0	0	0	0	0	0	0	0	4.24708e-06	0	0	4.45605e-06	0	0	0	3.15596e-06	2.11105e-06	0	0	0	0	0
Halohasta	2.24892e-06	1.82971e-05	7.00265e-06	0	0	0	0	0	0	0	0	3.03097e-06	0	0	3.85125e-06	0	0	0	0	0	0	0	0	0	0	0	0
Paenibacillus	0	0	0	0	0	1.60135e-05	0	0	3.0284e-06	0	0	0	0	0	0	0	0	0	0	0	3.15596e-06	0	0	0	0	0	3.90166e-06
Bradyrhizobium	0	0	0	0	0	5.33783e-06	0	0	0	0	0	0	7.39432e-06	4.24708e-06	0	0	4.45605e-06	0	0	0	0	0	0	0	0	0	0
Natronomonas	0	0	0	0	2.009e-06	5.33783e-06	1.6984e-06	0	0	0	0	0	0	0	7.7025e-06	0	0	0	0	0	0	0	0	0	0	0	0
Halobacterium	0	1.82971e-06	7.00265e-06	0	0	0	0	0	3.0284e-06	0	0	0	0	0	0	0	0	0	0	0	0	0	0	0	0	0	0
Halorubrum	0	3.65942e-06	7.00265e-06	0	0	0	0	0	0	0	0	0	0	0	0	0	0	0	0	0	0	0	0	0	0	0	0
Haloterrigena	0	0	7.00265e-06	0	2.009e-06	0	0	0	0	0	0	0	0	0	0	0	0	0	0	0	0	0	0	0	0	0	0
Fusobacterium	0	0	7.00265e-06	0	0	0	0	0	0	0	0	0	0	0	0	0	0	0	0	0	0	0	0	0	0	0	0
Hyphomicrobium	3.73184e-06	0	0	0	0	0	0	0	0	0	0	0	0	0	0	0	0	0	0	0	0	0	0	2.26325e-06	0	0	0
Sulfurihydrogenibium	0	0	0	0	0	0	0	0	0	0	0	3.03097e-06	0	0	0	0	0	0	0	0	0	0	0	0	0	0	0
Halorientalis	0	1.82971e-06	0	0	0	0	0	0	0	0	0	0	0	0	0	0	0	0	0	0	0	0	0	0	0	0	0
Singulisphaera	1.24395e-06	0	0	0	0	0	0	0	0	0	0	0	0	0	0	0	0	0	0	0	0	0	0	0	0	0	0
Sulfuricurvum	1.07325e-06	0	0	0	0	0	0	0	0	0	0	0	0	0	0	0	0	0	0	0	0	0	0	0	0	0	0

## Sheet: Sheet 10
	IN	PCa1	PCa2	PCa3	PCa4	PCa5	PMa1	PMa2	PMa3	PMa4	PMa5	PGa1	PGa2	PGa3	PCb1	PCb2	PCb3	PCb4	PCb5	PMb1	PMb2	PMb3	PMb4	PMb5	PGb1	PGb2	PGb3
Arcobacter	0.0131968	0.000488972	0.0118626	0.00860551	0.000127351	0.00208615	0.000555416	0.00266474	0.000985109	0.000444612	0.0322496	0.00320057	0.00645202	0.00234465	0.000607262	0.00297955	0.000350896	0.00105832	0.00247556	0.00994169	4.10295e-05	7.71879e-05	0.00281525	0.00138289	0.0029253	0.000952106	0.000256655
Sulfurimonas	0.00568412	0.000198232	0.000282795	0.0229668	0.0194075	0.00149165	0.00235518	0.00792728	0.00398461	0.0280353	0.00108429	0.0010903	0.0103457	0.000387421	0.0057464	0.0008488	0.00848199	0.0111186	0.00469427	0.000349303	6.62785e-05	0.000540315	0.000901084	0.00297596	0.000404309	0.0186971	0.0010431
Sulfurovum	0.00684872	0.00411	0.00600349	0.00580204	0.00208311	0.00206994	0.00998147	0.0127799	0.0112161	0.0079395	0.00203741	0.00203993	0.00326759	0.00072956	0.0190158	0.023948	0.00283943	0.0031319	0.00240452	0.0010076	0.00125614	0.00725566	0.00113017	0.00229365	0.00137941	0.00660797	0.00278789
Rhodopirellula	5.34991e-05	0.000634342	5.00782e-05	5.13455e-06	3.18379e-05	0.00139977	0.000373838	2.92828e-05	3.09227e-05	6.70447e-05	8.74424e-05	0.00101996	0.000112507	0.000125786	0.000160598	0.000115944	5.24327e-05	0.000196898	0.000502762	0.000819518	0.000142025	5.14586e-05	0.000188362	0.000286326	0.00145076	0.000301355	0.000350841
Coraliomargarita	0.00039166	0.00029074	0.000114885	0.000215651	4.54827e-06	9.72815e-05	0.000667567	2.09163e-05	2.20876e-05	9.88027e-05	0.000393491	0.00165304	0.000127182	0.000171069	0.000255953	0.000142196	1.61331e-05	0	0.000251381	0.000295564	9.46835e-05	0.000164668	0.000167999	7.91966e-05	0.000677813	2.62048e-05	0.000306103
Salinigranum	3.91537e-06	0	0.000288686	4.10764e-05	2.72896e-05	5.40453e-06	4.0054e-05	4.60159e-05	1.32526e-05	0.000141147	0	0.00190628	0	6.54088e-05	5.01869e-06	0.000363146	1.20998e-05	6.15305e-06	6.01129e-05	0.000188086	6.62785e-05	0.000349918	3.05452e-05	6.09204e-06	0.000344852	6.55119e-05	0.000734647
Haloferax	6.71311e-06	0	0.000471324	1.02691e-05	7.27723e-05	5.40453e-06	5.07351e-05	0.000221713	7.95155e-05	2.82293e-05	0	0.000492396	9.7832e-06	1.00629e-05	0	0.00196668	1.20998e-05	6.15305e-06	9.83666e-05	2.68694e-05	3.47173e-05	0.00021098	0	0	0.000118915	7.42468e-05	9.88947e-05
Methyloceanibacter	8.32233e-05	9.25082e-05	0.000212096	0.000107826	0.00047302	5.40453e-05	0.000117492	0.00017988	0.000207624	4.2344e-05	0	1.40685e-05	9.7832e-05	0.000120755	4.01496e-05	9.4068e-05	0.000100832	2.46122e-05	8.74369e-05	1.34347e-05	0.000173586	0.00014923	4.0727e-05	6.09204e-05	3.56744e-05	7.86143e-05	4.70927e-05
Halohasta	3.00331e-06	0	6.18613e-05	0	4.54827e-06	5.40453e-06	1.33513e-05	0.000171514	1.32526e-05	3.52867e-06	0	0.000633081	0	5.03145e-06	0	4.37526e-05	0	0	1.09296e-05	2.68694e-05	1.89367e-05	7.2042e-05	0	0	4.75658e-05	1.31024e-05	1.17732e-05
Phycisphaera	1.40325e-05	9.25082e-05	2.06204e-05	0	2.72896e-05	5.40453e-06	3.73838e-05	5.01991e-05	1.76701e-05	3.52867e-06	3.4977e-05	0.00018289	4.8916e-06	3.52201e-05	1.50561e-05	8.75051e-06	2.01664e-05	0	5.46481e-06	9.4043e-05	4.10295e-05	3.08752e-05	0	1.52301e-05	0.000214046	8.73492e-06	6.82845e-05
Natronomonas	1.95769e-06	1.32155e-05	8.24818e-05	3.08073e-05	1.81931e-05	0	2.67027e-05	3.34661e-05	0	3.52867e-05	8.74424e-06	0.000386883	0	2.01258e-05	5.01869e-06	0.000131258	4.03328e-06	0	1.09296e-05	1.34347e-05	0	6.68962e-05	5.09087e-06	0	3.56744e-05	1.74698e-05	5.88659e-05
Opitutus	1.26477e-05	0	1.17831e-05	0	2.72896e-05	0.000443171	0	0	0	3.52867e-05	7.86982e-05	0	5.38076e-05	0.00010566	5.01869e-06	6.56289e-06	4.03328e-06	6.15305e-06	2.18592e-05	0	0	0	0	7.31045e-05	0	0	1.88371e-05
Halorubrum	3.91537e-06	0	2.35662e-05	5.13455e-06	0	0	8.01081e-06	8.36652e-06	1.32526e-05	3.52867e-06	0	0.000506464	0	0	0	1.31258e-05	0	0	0	1.34347e-05	0	2.05834e-05	5.09087e-06	0	5.94573e-05	0	4.23835e-05
Sulfuricurvum	5.59547e-06	0	0	0	0	9.72815e-05	0	0	0	0	8.74424e-06	0	0	1.50943e-05	0	2.18763e-06	0	6.15305e-06	3.27889e-05	0	0	0	0	3.04602e-06	0	0	2.35464e-05
Bacillus	6.64109e-06	0	5.89155e-05	2.05382e-05	1.36448e-05	1.08091e-05	2.67027e-06	0	0	3.52867e-06	0	0	0	1.00629e-05	5.01869e-06	2.84392e-05	0	0	5.46481e-06	0	0	1.02917e-05	0	0	0	1.31024e-05	2.35464e-06
Methylobacterium	8.3932e-06	0	1.17831e-05	1.02691e-05	1.36448e-05	1.08091e-05	0	4.18326e-06	0	0	0	7.03423e-06	4.8916e-06	3.52201e-05	0	0	0	0	1.09296e-05	0	0	0	0	1.52301e-05	0	4.36746e-06	9.41855e-06
Halobacterium	0	0	1.76747e-05	0	9.09653e-06	0	5.34054e-06	0	0	1.41147e-05	0	1.40685e-05	0	1.00629e-05	0	2.18763e-05	0	0	1.09296e-05	0	3.15612e-06	1.02917e-05	0	0	2.37829e-05	0	2.35464e-06
Roseomonas	8.3932e-06	0	5.89155e-06	0	0	5.40453e-06	5.34054e-06	0	0	0	0	2.81369e-05	0	5.03145e-06	5.01869e-06	2.18763e-06	0	0	5.46481e-06	0	3.15612e-06	0	5.09087e-06	0	0	0	1.64825e-05
Halorientalis	0	0	0	0	0	0	0	0	0	7.05734e-06	0	2.81369e-05	0	0	0	6.56289e-06	0	0	0	0	3.15612e-06	5.14586e-06	5.09087e-06	0	0	0	1.17732e-05
Paenibacillus	5.2281e-06	0	0	1.54037e-05	0	0	0	0	0	0	8.74424e-06	0	4.8916e-06	5.03145e-06	5.01869e-06	0	0	0	0	0	0	0	0	0	0	8.73492e-06	0
Rubinisphaera	9.78843e-07	0	0	5.13455e-06	0	0	2.67027e-06	0	0	7.05734e-06	0	0	4.8916e-06	0	0	0	0	0	0	0	3.15612e-06	0	0	3.04602e-06	1.18915e-05	0	0
Nocardioides	1.04562e-06	0	0	0	0	0	0	0	0	0	0	0	0	1.50943e-05	0	2.18763e-06	0	6.15305e-06	0	0	0	0	0	3.04602e-06	0	4.36746e-06	4.70927e-06
Filomicrobium	3.00331e-06	0	0	0	0	0	5.34054e-06	0	4.41753e-06	0	0	0	0	0	5.01869e-06	1.09381e-05	0	0	0	0	6.31223e-06	0	0	0	0	0	0
Pirellula	0	0	0	0	0	0	2.67027e-06	0	0	0	0	7.03423e-06	0	0	5.01869e-06	0	0	0	0	1.34347e-05	3.15612e-06	0	0	0	0	0	0
Haloterrigena	0	0	2.94578e-06	0	4.54827e-06	0	2.67027e-06	0	0	3.52867e-06	0	0	0	0	0	6.56289e-06	0	0	0	0	0	0	0	0	0	0	2.35464e-06
Bosea	0	0	8.83733e-06	0	0	0	0	0	0	0	0	7.03423e-06	0	5.03145e-06	0	0	0	0	0	0	0	0	0	0	0	0	0
Brevibacillus	0	0	5.89155e-06	0	0	0	0	0	0	0	0	0	0	0	0	0	0	0	0	0	0	0	0	0	0	8.73492e-06	0
Fusobacterium	9.78843e-07	0	0	0	0	0	0	8.36652e-06	0	0	0	0	4.8916e-06	0	0	0	0	0	0	0	0	0	0	0	0	0	0
Haloarcula	0	0	0	0	0	0	2.67027e-06	0	0	0	0	0	0	0	0	0	0	0	0	0	0	0	5.09087e-06	0	0	0	4.70927e-06
Bradyrhizobium	0	0	0	0	0	0	0	0	4.41753e-06	0	0	0	0	0	0	0	0	0	0	0	3.15612e-06	0	0	0	0	0	0
Hyphomicrobium	0	0	0	0	0	0	2.67027e-06	0	0	0	0	0	0	0	0	0	0	0	0	0	0	0	0	0	0	0	0
Singulisphaera	0	0	0	0	0	0	0	0	0	0	0	0	0	0	0	0	0	0	0	0	0	0	0	0	0	0	0
Sulfurihydrogenibium	0	0	0	0	0	0	0	0	0	0	0	0	0	0	0	0	0	0	0	0	0	0	0	0	0	0	0

[truncated: 12 more sheets: Sheet 11, Sheet 12, Sheet 13, Sheet 14, Sheet 15, Sheet 16, Sheet 17, Sheet 18, Sheet 19, Sheet 20, Sheet 21, Sheet 22]
